1 **The Mouse Action Recognition System (MARS): a software pipeline for automated analysis**  
2 **of social behaviors in mice**

3  
4 Cristina Segalin<sup>1</sup>, Jalani Williams<sup>1</sup>, Tomomi Karigo<sup>2</sup>, May Hui<sup>2</sup>, Moriel Zelikowsky<sup>2,3</sup>, Jennifer  
5 J. Sun<sup>1</sup>, Pietro Perona<sup>1</sup>, David J. Anderson<sup>2,4</sup>, and Ann Kennedy<sup>2,5,6</sup>

6  
7 <sup>1</sup> Department of Computing & Mathematical Sciences  
8 California Institute of Technology  
9 Pasadena, CA, 91125 USA

10  
11 <sup>2</sup> Division of Biology and Biological Engineering 156-29  
12 TianQiao and Chrissy Chen Institute for Neuroscience  
13 California Institute of Technology  
14 Pasadena, CA, 91125 USA

15  
16 <sup>3</sup> Current Address: Department of Neurobiology and Anatomy  
17 University of Utah  
18 Salt Lake City, UT, 84112 USA

19  
20 <sup>4</sup> Howard Hughes Medical Institute  
21 California Institute of Technology  
22 Pasadena, CA, 91125 USA

23  
24 <sup>5</sup> Current Address: Department of Physiology  
25 Northwestern University Feinberg School of Medicine  
26 Chicago, IL 60611 USA

27  
28 <sup>6</sup> Author for correspondence. Email: [ann.kennedy@northwestern.edu](mailto:ann.kennedy@northwestern.edu)

29

## 30 Abstract

31 The study of naturalistic social behavior requires quantification of animals' interactions. This is generally  
32 done through manual annotation—a highly time consuming and tedious process. Recent advances in  
33 computer vision enable tracking the pose (posture) of freely-behaving animals. However, automatically  
34 and accurately classifying complex social behaviors remains technically challenging. We introduce the  
35 Mouse Action Recognition System (MARS), an automated pipeline for pose estimation and behavior  
36 quantification in pairs of freely interacting mice. We compare MARS's annotations to human annotations  
37 and find that MARS's pose estimation and behavior classification achieve human-level performance. We  
38 also release the pose and annotation datasets used to train MARS, to serve as community benchmarks  
39 and resources. Finally, we introduce the Behavior Ensemble and Neural Trajectory Observatory (BENTO),  
40 a graphical user interface for analysis of multimodal neuroscience datasets. Together, MARS and BENTO  
41 provide an end-to-end pipeline for behavior data extraction and analysis, in a package that is user-friendly  
42 and easily modifiable. **(148/150 words)**

## 43 Introduction

44 The brain evolved to guide survival-related behaviors, which frequently involves interaction with other  
45 animals. Gaining insight into brain systems that control these behaviors requires recording and  
46 manipulating neural activity while measuring behavior in freely moving animals. Recent technological  
47 advances, such as miniaturized imaging and electrophysiological devices have enabled the recording of  
48 neural activity in freely behaving mice<sup>1-3</sup>—however to make sense of the recorded neural activity, it is also  
49 necessary to obtain a detailed characterization of the animals' actions during recording. This is usually  
50 accomplished via manual scoring of the animals' actions<sup>4-6</sup>. A typical study of freely behaving animals can  
51 produce tens to hundreds of hours of video that require manual behavioral annotation<sup>7-9</sup>. Scoring for  
52 social behaviors often takes human annotators 3-4x the video's duration to annotate; for long recordings,  
53 there is also risk of drops in annotation quality due to drifting annotator attention. It is unclear to what  
54 extent individual human annotators within and between different labs agree on the definitions of  
55 behaviors, especially the precise timing of behavior onset/offset. When behavior is being analyzed  
56 alongside neural recording data, it is also often unclear whether the set of social behaviors that were  
57 chosen to annotate are a good fit for explaining the activity of a neural population, or whether other,  
58 unannotated behaviors with clearer neural correlates may have been missed.

59 An accurate, sharable, automated approach to scoring social behavior is thus needed. Use of such a  
60 pipeline would enable social behavior measurements in large-scale experiments (e.g., genetic or drug  
61 screens), and comparison of data sets generated across the neuroscience community by using a common  
62 set of definitions and classification methods for behaviors of interest. Automation of behavior  
63 classification using machine learning methods poses a potential solution to both the time demand of  
64 annotation and to the risk of inter-individual and inter-lab differences in annotation style.

65 We present the Mouse Action Recognition System (MARS), a quartet of software tools for automated  
66 behavior analysis, training and evaluation of novel pose estimator and behavior classification models, and  
67 joint visualization of neural and behavioral data (**Fig 1**). This software is accompanied by three datasets  
68 aimed at characterizing inter-annotator variability for both pose and behavior annotation. Together, the

69 software and datasets introduced in this paper provide a robust computational pipeline for the analysis  
70 of social behavior in pairs of interacting mice, and establish essential measures of reliability and sources  
71 of variability in human annotations of animal pose and behavior.

72

## 73 **Contributions**

74 The contributions of this paper are as follows:

75 **Data.** MARS pose estimators are trained on a novel corpus of manual pose annotations in top- and front-  
76 view video (**ED Fig 1**) of pairs of mice engaged in a standard resident-intruder assay<sup>10</sup>. These data include  
77 a variety of experimental manipulations of the resident animal, including mice that are unoperated,  
78 cannulated, or implanted with fiberoptic cables, fiber photometry cables, or a head-mounted  
79 microendoscope, with one or more cables leading from the animal's head to a commutator feeding out  
80 the top of the cage.

81 **Multi-annotator pose dataset.** Anatomical landmarks ('keypoints' in the following) in this training set are  
82 manually annotated by five human annotators, whose labels are combined to create a "consensus"  
83 keypoint location for each image. Nine anatomical keypoints are annotated on each mouse in the top  
84 view, and thirteen in the front view (two keypoints, corresponding to the midpoint and end of the tail, are  
85 included in this dataset but were omitted in training MARS due to high annotator noise.)

86 **Behavior classifier training/testing dataset.** MARS includes three supervised classifiers trained to detect  
87 attack, mounting, and close investigation behaviors in tracked animals. These classifiers were trained on  
88 7.3 hours of behavior video, 4 hours of which were obtained from animals with a cable-attached device  
89 such as a microendoscope. Separate evaluation (3.65 hours) and test (3.37 hours) sets of videos were  
90 used to constrain training and evaluate MARS performance, giving a total of over 14 hours of video (**ED**  
91 **Fig 2**). All videos were manually annotated on a frame-by-frame basis by a single trained human  
92 annotator. Most videos in this dataset are a subset of the recent CalMS mouse social behavior dataset<sup>11</sup>  
93 (specifically, from Task 1.)

94 **Multi-annotator behavior dataset.** To evaluate inter-annotator variability in behavior classification, we  
95 also collected frame-by-frame manual labels of animal actions by eight trained human annotators on a  
96 dataset of ten 10-min videos. Two of these videos were annotated by all eight annotators a second time  
97 a minimum of 9 months later, for evaluation of annotator self-consistency.

98 All three datasets can be found at <https://neuroethology.github.io/MARS/> under "datasets."

99 **Software.** This paper is accompanied by four software tools, all of which can be found on the MARS  
100 project website at: <https://neuroethology.github.io/MARS/>

101 **The Mouse Action Recognition System (MARS)** is an open-source, Python-based tool for running trained  
102 detection, pose estimation, and behavior classification models on video data. MARS can be run on a  
103 desktop computer equipped with Tensorflow and a graphical processing unit (GPU), and supports both  
104 Python command-line and GUI-based usage (**ED Fig 3**). The MARS GUI allows users to select a directory  
105 containing videos, and will produce as output a folder containing bounding boxes, pose estimates,  
106 features, and predicted behaviors for each video in the directory.

107 **MARS\_Developer** is a Python suite for training MARS on new datasets and behaviors. It includes the  
108 following components: 1) a module for collecting crowdsourced pose annotation datasets, 2) a module  
109 for training a Multibox detector, 3) a module for training a stacked hourglass network for pose estimation,  
110 and 4) a module for training new behavior classifiers. It is accompanied by a Jupyter notebook guiding  
111 users through the training process.

112 **MARS\_pycocotools** is a fork of the popular COCO API for evaluation of object detection and pose  
113 estimation models<sup>12</sup>, and is included with MARS\_Developer. In addition to the original COCO API, it  
114 includes added scripts for quantifying performance of keypoint-based pose estimates, as well as added  
115 support for computing Object Keypoint Similarity scores (see Methods) in laboratory mice.

116 **The Behavior Ensemble and Neural Trajectory Observatory (BENTO)** is a Matlab-based GUI for  
117 synchronous display of neural recording data, multiple videos, human/automated behavior annotations,  
118 spectrograms of recorded audio, pose estimates, and 270 “features” extracted from MARS pose data—  
119 such as animals’ velocities, joint angles, and relative positions. It features an interface for fast frame-by-  
120 frame manual annotation of animal behavior, as well as a tool to create annotations programmatically by  
121 applying thresholds to combinations of the MARS pose features. BENTO also provides tools for  
122 exploratory neural data analysis, such as PCA and event-triggered averaging, as well as interfaces for  
123 manual and semi-automated data annotation. While BENTO can be linked to MARS to annotate and train  
124 classifiers for behaviors of interest, BENTO may also be used independently, and with plugin support can  
125 be used to display pose estimates from other systems such as DeepLabCut<sup>13</sup>.

126

## 127 **Related Work**

128 Automated tracking and behavior classification can be broken into a series of computational steps, which  
129 may be implemented separately, as we do, or combined into a single module. First, animals are detected,  
130 producing a 2D/3D centroid, blob, or bounding box that captures the animal’s location, and possibly its  
131 orientation. When animals are filmed in an empty arena, a common approach is to use background  
132 subtraction to segment animals from their environments<sup>9</sup>. Deep networks for object detection (such as  
133 Inception Resnet<sup>14</sup>, Yolo<sup>15</sup>, or Mask R-CNN<sup>16</sup>) may also be used. Some behavior systems, such as  
134 Ethovision<sup>17</sup>, MoTr<sup>18</sup>, idTracker<sup>19</sup>, and previous work from our group<sup>20</sup>, classify behavior from this location  
135 and movement information alone. MARS uses the MSC-Multibox approach to detect each mouse prior to  
136 pose estimation; this architecture was chosen for its combined speed and accuracy.

137 The tracking of multiple animals poses problems not encountered in single-animal tracking systems. First,  
138 each animal must be detected, located, and identified consistently over the duration of the video. Altering  
139 the appearance of individuals using paint or dye, or selecting animals with differing coat colors, facilitates  
140 this task<sup>18,21</sup>. In cases where these manipulations are not possible, animal identity can in some cases be  
141 tracked by identity-matching algorithms<sup>9</sup>. The pre-trained version of MARS requires using animals of  
142 differing coat colors (black and white).

143 Second, the posture (“pose”) of the animal, including its orientation and body part configuration, is  
144 computed for each frame, and tracked across frames. A pose estimate comprises the position and identity  
145 of multiple tracked body parts, either in terms of a set of anatomical “keypoints”<sup>22</sup>, shapes<sup>23,24</sup>, or a dense

146 2D or 3D mesh<sup>25</sup>. Keypoints are typically defined based on anatomical landmarks (nose, ears, paws, digits)  
147 and their selection is determined by the experimenter depending on the recording setup and type of  
148 motion being tracked.

149 Animal tracking and pose estimation systems have evolved in step with the field of computer vision. Early  
150 computer vision systems relied on specialized data acquisition setups using multiple cameras and/or  
151 depth sensors<sup>20</sup>, and were sensitive to minor changes in experimental conditions. More recently, systems  
152 for pose estimation based on machine learning and deep neural networks, including DeepLabCut<sup>13</sup>,  
153 LEAP<sup>26</sup>, and DeepPoseKit<sup>27</sup>, have emerged as a flexible and accurate tool in behavioral and systems  
154 neuroscience. These networks, like MARS's pose estimator, are more accurate and more adaptable to  
155 recording changes than their predecessors<sup>28</sup>, although they require an initial investment in creating  
156 labeled training data before they can be used.

157 Third, once raw animal pose data are acquired, a classification or identification of behavior is required.  
158 Several methods have been introduced for analyzing the actions of animals in an unsupervised or semi-  
159 supervised manner, in which behaviors are identified by extracting features from the animal's pose and  
160 performing clustering or temporal segmentation based on those features, including Moseq<sup>29</sup>,  
161 MotionMapper<sup>30</sup>, and multiscale unsupervised structure learning<sup>31</sup>. Unsupervised techniques are said to  
162 identify behaviors in a "user-unbiased" manner (although the behaviors identified do depend on how  
163 pose is pre-processed prior to clustering). Thus far they are most successful when studying individual  
164 animals in isolation.

165 Our goal is to detect complex and temporally structured social behaviors that were previously determined  
166 to be of interest to experimenters, therefore MARS takes a supervised learning approach to behavior  
167 detection. Recent examples of supervised approaches to detection of social behavior include Giancardo  
168 et al<sup>32</sup>, MiceProfiler<sup>33</sup>, SimBA<sup>34</sup>, and Hong et al<sup>20</sup>. Like MARS, SimBA uses a keypoint-based representation  
169 of animal pose, obtained via separate software (supported pose representations include DeepLabCut<sup>13</sup>,  
170 DeepPoseKit<sup>27</sup>, SLEAP<sup>35</sup>, and MARS itself.) In contrast, Giancardo et al, Hong et al, and MiceProfiler are  
171 pre-deep-learning methods that characterize animal pose in terms of geometrical primitives<sup>20,32</sup> or  
172 contours extracted using background subtraction<sup>33</sup>. Following pose estimation, all five systems extract a  
173 set of hand-crafted spatiotemporal features from animal pose: features common to all systems include  
174 relative position, animal shape (typically body area), animal movement, and inter-animal orientation.  
175 MARS and Hong et al use additional hand-crafted features capturing the orientation and minimum  
176 distances between interacting animals. Both MARS and SimBA adopt the rolling feature-windowing  
177 method introduced by JAABA<sup>36</sup>, although choice of windowing differs modestly: SimBA computes raw and  
178 normalized feature median, mean, and sum within five rolling time windows, whereas MARS computes  
179 feature mean, standard deviation, minimum, and maximum values, and uses three windows. Finally, most  
180 methods use these hand-crafted features as inputs to trained ensemble-based classifiers: Adaptive  
181 Boosting in Hong et al, Random Forests in SimBA, Temporal Random Forests in Giancardo et al, and  
182 Gradient Boosting in MARS; MiceProfiler instead identifies behaviors using hand-crafted functions. While  
183 there are many similarities between the approaches of these tools, direct comparison of performance is  
184 challenging due to lack of standardized evaluation metrics. We have attempted to address this issue in a  
185 separate paper<sup>11</sup>.

186 A last difference between these five supervised approaches is their user interface and flexibility. Three  
187 are designed for out-of-the-box use in single, fixed settings: Giancardo et al and Hong et al in the resident-  
188 intruder assay, and MiceProfiler in a large open-field arena. SimBA is fully user-defined, functioning in  
189 diverse experimental arenas but requiring users to train their own pose estimation and behavior models;  
190 a graphical user interface (GUI) is provided for this purpose. MARS takes a hybrid approach: whereas the  
191 core “end-user” version of MARS provides pre-trained pose and behavior models that function in a  
192 standard resident-intruder assay, MARS\_Developer allows users to train MARS pose and behavior models  
193 for their own applications. Unique to MARS\_Developer is a novel library for collecting crowdsourced pose  
194 annotation datasets, including tools for quantifying inter-human variability in pose labels and using this  
195 variability to evaluate trained pose models. The BENTO GUI accompanying MARS is also unique: while  
196 Bento does support behavior annotation and (like SimBA) behavior classifier training, it is aimed primarily  
197 at exploratory analysis of multimodal datasets. In addition to pose and annotation data, BENTO can  
198 display neural recordings and audio spectrograms, and supports basic neural data analyses such as event-  
199 triggered averaging, k-means clustering, and dimensionality reduction.

200 Lastly, supervised behavior classification can also be performed directly from video frames, forgoing the  
201 animal detection and pose estimation steps<sup>37,38</sup>. This is usually done by adopting variations of  
202 convolutional neural networks (CNNs) to classify frame by frame actions, or combining CNN and recurrent  
203 neural network (RNN) architectures that classify the full video as an action or behavior, and typically  
204 requires many more labeled examples than pose-based behavior classification. We chose a pose-based  
205 approach for MARS both because it requires fewer training examples, and because we find that the  
206 intermediate step of pose estimation is useful in its own right for analyzing finer features of animal  
207 behavior and is more interpretable than features extracted by CNNs directly from video frames.

208

## 209 Results

### 210 Characterizing variability of human pose annotations

211 We investigated the degree of variability in human annotations of animal pose for two camera  
212 placements—filming animal interactions from above and from the front—using our previously published  
213 recording chamber<sup>20</sup> (**ED Fig 1A**). We collected 93 pairs of top- and front-view behavior videos (over 1.5  
214 million frames per view) under a variety of lighting/camera settings, bedding conditions, and experimental  
215 manipulations of the recorded animals (**ED Fig 1B**). A subset of 15,000 frames were uniformly sampled  
216 from each of the top- and front-view datasets, and manually labeled by trained human annotators for a  
217 set of anatomically defined keypoints on the bodies of each mouse (**Fig. 2A-B**, see **Methods** for description  
218 of annotator workforce). 5,000 frames in our labeled dataset are from experiments in which the black  
219 mouse was implanted with either a microendoscopic, fiber photometry, or optogenetic system attached  
220 to a cable of varying color and thickness. This focus on manipulated mice allowed us to train pose  
221 estimators to be robust to the presence of devices or cables.

222 To assess annotator reliability, each keypoint in each frame was annotated by five individuals; the median  
223 across annotations was taken to be the ground truth location of that keypoint, as we found this approach  
224 to be robust to outliers (**Fig 2C-F**, see **Methods**). To quantify annotator variability we adapted the widely



225 used Percent Correct Keypoints (or PCK) metric used for pose estimate evaluation<sup>39</sup>. First, for each frame,  
226 we computed the distance of each keypoint by each annotator to the median keypoint location across the  
227 remaining four annotators. Next, we computed the percentage of frames for which the annotator closest  
228 to ground truth on a given frame was within a radius X, over a range of values of X (**Fig. 2G-H, blue lines**).  
229 Finally, we repeated this calculation using the annotator furthest from ground truth on each frame (**green**  
230 **lines**) and the average annotator distance to ground truth on each frame (**orange lines**)- thus giving a  
231 sense of the range of human performance in pose annotation. We observed much higher inter-annotator  
232 variability for front view videos compared to top view videos: 86.2% of human-annotated keypoints fell  
233 within a 5mm radius of ground truth in top-view frames, while only 52.3% fell within a 5mm radius of  
234 ground truth in front-view frames (scale bar in **Fig. 2E-F**). Higher inter-annotator variability in the front  
235 view likely arises from the much higher incidence of occlusion in this view, as can be seen in the sample  
236 frames in **ED Fig 1B**.

237

### 238 **Pose estimation of unoperated and device-implanted mice in the resident-** 239 **intruder assay**

240 We used our human-labeled pose dataset to train a machine learning system for pose estimation in  
241 interacting mice. While multiple pose estimation systems exist for laboratory mice<sup>13,26,27</sup>, we chose to  
242 include a novel pose estimation system within MARS for three reasons: 1) to produce an adequately  
243 detailed representation of the animal's posture, 2) to allow integration of MARS with existing tools that  
244 detect mice (in the form of bounding boxes) but do not produce detailed pose estimates, and 3) to ensure  
245 high-quality pose estimation in cases of occlusion and motion blur during social interactions. Pose  
246 estimation in MARS is carried out in two stages: MARS first detects the body of each mouse (**Fig 3**), then  
247 crops the video frame to the detected bounding box and estimates the animal's pose within the cropped  
248 image (**Fig 4**).

249 MARS's detector performs MSC-Multibox detection<sup>40</sup> using the Inception ResNet v2<sup>14</sup> network  
250 architecture (see **Methods** for details; **Fig 3A**). We evaluated detection performance using the Intersection  
251 Over Union (IoU) metric<sup>12</sup> for both top- and front-view datasets (**Fig 3B, D**). Plotting Precision-Recall (PR)  
252 curves for various IoU cutoffs revealed a single optimal performance point for both the black and white  
253 mouse, in both the top and front view (seen as an "elbow" in plotted PR curves, **Fig 3C, E**).

254 Following detection, MARS estimates the pose of each mouse using a Stacked Hourglass network  
255 architecture with eight hourglass subunits<sup>41</sup> (**Fig 4A**). Stacked Hourglass networks achieve high  
256 performance in human pose estimation, and similar two-hourglass architectures produce accurate pose  
257 estimates in single animal settings<sup>26,27</sup>. The Stacked Hourglass network architecture pools information  
258 across multiple spatial scales of the image to infer the location of keypoints, producing high quality pose  
259 estimates even in cases of occlusion and motion blur (**Fig 4D**).

260 To contrast MARS performance to human annotator variability, we first evaluated MARS in terms of the  
261 PCK metric introduced in **Fig 2**. MARS pose estimates reach the upper limit of human accuracy for both  
262 top and front view frames, suggesting that quality of human pose annotation is a limiting factor of the  
263 model's performance (**Fig. 4B-C**). In the top view, 92% of estimated keypoints fell within 5mm of ground

264 truth, while in the front view 67% of estimates fell within a 5mm radius of ground truth (scale bar in **Fig**  
265 **2E**). Because of the poor performance of front-view pose estimation, we opted to use only the top-view  
266 video and pose in our supervised behavior classifiers.

267 To summarize the performance of MARS's keypoint estimation model, we also used the Object Keypoint  
268 Similarity (OKS) metric<sup>42</sup>, as this is widely used in the human pose estimation literature<sup>12,43</sup>, and has been  
269 adopted by other multi-animal pose estimation tools<sup>26</sup>. For each body part, OKS computes the distance  
270 between ground-truth and predicted keypoints, normalized by the variance *sigma* of human annotators  
271 labeling that part. We computed the human variance term sigma from our 15,000 frame manual  
272 annotation dataset, and observed values ranging from 0.039 to 0.084 in top-view images, and 0.087 to  
273 0.125 in front-view images (see **Methods**). We also computed OKS using a fixed sigma of 0.025 for all body  
274 parts, for direct comparison with OKS scores reported by SLEAP<sup>26</sup>. Following the approach established by  
275 COCO<sup>12</sup>, we report OKS in terms of the mean Average Precision (mAP) and mean Average Recall (mAR), as  
276 well as by the Average Precision and Average Recall at two specific IoU cutoffs (see **Methods** for details).  
277 Results are shown in **Table 1**. Finally, we use the approach of Ronchi and Perona to break down keypoint  
278 location errors by class (**ED Fig 4**); we find that keypoint error is best accounted for by noise in point  
279 placement, and by left/right inversion in the front-view pose estimates.

|           | sigma from data | sigma = 0.025 |
|-----------|-----------------|---------------|
| mAP       | 0.902           | 0.628         |
| AP@IoU=50 | 0.99            | 0.967         |
| AP@IoU=75 | 0.957           | 0.732         |
| mAR       | 0.924           | 0.681         |
| AR@IoU=50 | 0.991           | 0.97          |
| AR@IoU=75 | 0.97            | 0.79          |

**Table 1: Performance of MARS top-view pose estimation model.** “Sigma from data” column normalizes pose model performance by observed inter-human variability of each keypoint estimate.

280 On a desktop computer with 8-core Intel Xeon CPU, 24Gb RAM, and a 12GB Titan XP GPU, MARS performs  
281 two-animal detection and pose estimation (a total of four operations) at approximately 11Hz.

282

## 283 **Quantifying inter-annotator variability in the scoring of social behaviors**

284 As in pose estimation, different human annotators can show substantial variability in their annotation of  
285 animals' social behaviors, even when those individuals are trained in the same lab. To better understand  
286 the variability of human behavioral annotations, we collected annotation data from eight experienced  
287 annotators on a common set of 10 behavior videos. Human annotators included three senior laboratory  
288 technicians, two postdocs with experience studying mouse social behavior, two graduate students with  
289 experience studying mouse social behavior, and one graduate student with previous experience studying  
290 fly social behavior. All annotators were instructed to score the same three social behaviors: close  
291 investigation, mounting, and attack, and given written descriptions of each behavior (see **Methods**). Two



292 of the eight annotators showed a markedly different annotation “style” with far longer bouts of some  
293 behaviors, and were omitted from further analysis (see **ED Fig 5**).

294 We noted several forms of inter-annotator disagreement, consisting of 1) the precise timing of initiation  
295 of behavior (**ED Fig 6**), 2) at what point investigation behavior transitioned to attack, and 3) the extent to  
296 which annotators merged together multiple consecutive bouts of the same behavior (**Fig 5A**). Other inter-  
297 annotator differences which we could not characterize could be ascribed to random variation. Inter-  
298 annotator differences in behavior quantification were more pronounced when behavior was reported in  
299 terms of total bouts rather than cumulative behavior time, particularly for the two omitted annotators  
300 (**Fig 5B-C, ED Fig 5**).

301 Importantly, the Precision and Recall of annotators was highly dependent on the dataset used for  
302 evaluation; we found that the mean annotator F1 score was well predicted by the mean bout duration of  
303 annotations in a video, with shorter bout durations leading to lower annotator F1 scores (**ED Fig 7**). This  
304 suggests that annotator disagreement over the start and stop times of behavior bouts may be a primary  
305 form of inter-annotator variability. Furthermore, this finding shows the importance of standardized  
306 datasets for evaluating the performance of different automated annotation approaches.

307 Finally, to evaluate the stability of human annotations, all eight annotators re-scored two of the 10  
308 behavior videos a minimum of 10 months later. We then computed within- vs between-annotator  
309 agreement in terms of F1 score of annotations on these two videos. For both attack and close  
310 investigations, within-annotator F1 score was significantly higher than between-annotator F1 score (**ED**  
311 **Fig 8**, full stats in **Suppl. Table 2**). We hypothesize that this effect was not observed for mounting due to  
312 the higher within-annotator agreement for that behavior. These findings support our conclusion that  
313 inter-annotator variability reflects a genuine difference in annotation style between individuals, rather  
314 than inter-annotator variability being due to noise alone.

315

## 316 **MARS achieves high accuracy in the automated classification of three** 317 **social behaviors**

318 To create a training set for automatic detection of social behaviors in the resident-intruder assay, we  
319 collected manually annotated videos of social interactions between a male resident (black mouse) and a  
320 male or female intruder (white mouse). We found that classifiers trained with multiple annotators' labels  
321 of the same actions were less accurate than classifiers trained on a smaller pool of annotations from a  
322 single individual. Therefore, we trained classifiers on 6.95 hours of video annotated by a single individual  
323 (Human #1 in **Fig 5**) for attack, mounting, and close investigation behavior. To avoid overfitting, we  
324 implemented early stopping of training based on performance on a separate validation set of videos, 3.85  
325 hours in duration. Distributions of annotated behaviors in the training, evaluation, and test sets are  
326 reported in **ED Fig 2**.

327 As input to behavior classifiers, we designed a set of 270 custom spatiotemporal features from the tracked  
328 poses of the two mice in the top-view video (full list of features in **Suppl. Table 1**). For each feature, we  
329 then computed the feature mean, standard deviation, minimum, and maximum over windows of 0.1,  
330 0.37, and 0.7 seconds, to capture how features evolved in time. We trained a set of binary supervised

331 classifiers to detect each behavior of interest using the XGBoost algorithm<sup>44</sup>, then smoothed classifier  
332 output and enforced one-hot labeling (ie, one behavior/frame only) of behaviors with a Hidden Markov  
333 Model (HMM) (**Fig 6A**).

334 When tested on the 10 videos previously scored by multiple human annotators (“test set 1”, 1.7 hours of  
335 video, behavior breakdown in **ED Fig 2**), Precision and Recall of MARS classifiers was comparable to that  
336 of human annotators for both attack and close investigation, and slightly below human performance for  
337 mounting (**Fig 6B-C**, humans and MARS both evaluated with respect to Human #1). Varying the threshold  
338 of a given binary classifier in MARS produces a Precision-Recall curve (PR curve) showing the trade-off  
339 between the classifier’s true positive rate and its false positive rate (**Fig 6B-D**, black lines). Interestingly,  
340 the Precision and Recall scores of different human annotators often fell quite close to this PR curve.

341 False positive/negatives in MARS output could be due to mistakes by MARS, however they may also reflect  
342 noise or errors in the human annotations serving as our “ground truth.” We therefore also computed the  
343 Precision and Recall of MARS output relative to the pooled (median) labels of all six annotators. To pool  
344 annotators, we scored a given frame as positive for a behavior if at least three out of six annotators labeled  
345 it as such. Precision and Recall of MARS relative to this “denoised ground truth” was further improved,  
346 particularly for the attack classifier (**Fig 6D-E**).

347 The Precision and Recall of MARS on individual videos was highly correlated with the average Precision  
348 and Recall of individual annotators with respect to the annotator median (**ED Fig 6**). Hence, as for human  
349 annotators, Precision and Recall of MARS are correlated with the average duration of behavior bouts in a  
350 video (see **ED Fig 9B**), with longer behavior bouts leading to higher Precision and Recall values.

351 We next tested MARS classifiers on a second set of videos of mice with head-mounted microendoscopes  
352 or other cable-attached devices (“test set 2”, 1.66 hours of video, behavior breakdown in **ED Fig 2**). While  
353 Precision and Recall curves differ on this test set (**ED Fig 10A**), we do not observe a difference on individual  
354 videos with vs without cable when controlling for mean bout length in the video (**ED Fig 10B**). We  
355 therefore conclude that MARS classifier performance is robust to occlusions and motion artifacts  
356 produced by head mounted recording devices and cables.

357

## 358 **Training MARS on new data**

359 While MARS can be used out of the box with no training data, it is often useful to study additional social  
360 behaviors, or track animals in different environments. The MARS\_Developer library allows users to re-  
361 train MARS detection and pose estimation models in new settings, and to train their own behavior  
362 classifiers from manually annotated videos. The training code in this library is the same code that was  
363 used to produce the end-user version of MARS presented in this paper.

364 To demonstrate the functionality of MARS\_Developer, we trained detection and pose estimation  
365 networks on the CRIM13 dataset<sup>45</sup>. We used the pose\_annotation\_tools library to crowdsource manual  
366 annotation of animal pose on 5577 video frames, with 5 workers per frame (cost: \$0.38/image.) We then  
367 trained detection and pose models, using the existing MARS detection and pose models as starting points  
368 for training. We found that performance of trained models improved as a function of training set size,  
369 plateauing at around **1500** frames (**ED Fig 11A-C**). We also trained behavior classifiers for three additional

370 social behaviors of interest: face-directed sniffing, anogenital-directed sniffing, and intromission, using a  
371 subset of the MARS training set annotated for these behaviors. Trained classifiers achieved F1 scores of  
372 at least 0.7 for all three behaviors; by training on subsets of the full MARS dataset, we found that classifier  
373 performance improves logarithmically with training set size (**ED Fig 11D-E**). Importantly, the number of  
374 annotated bouts of a behavior is a better predictor of classifier performance than the number of  
375 annotated frames.

## 376 **Integration of video, annotation, and neural recording data in a user** 377 **interface**

378 Because one objective of MARS is to accelerate the analysis of behavioral and neural recording data, we  
379 developed an open-source interface to allow users to more easily navigate neural recording, behavior  
380 video, and tracking data (**Fig 7A**). This tool, called the Behavior Ensemble and Neural Trajectory  
381 Observatory (BENTO) allows users to synchronously display, navigate, analyze, and save movies from  
382 multiple behavior videos, behavior annotations, MARS pose estimates and features, audio recordings, and  
383 recorded neural activity. BENTO is currently Matlab-based, although a Python version is in development.

384 BENTO includes an interface for manual annotation of behavior, which can be combined with MARS to  
385 train, test, and apply classifiers for novel behaviors. A button in the BENTO interface allows users to launch  
386 training of new MARS behavior classifiers directly from their annotations. BENTO also allows users to  
387 access MARS pose features directly, to create hand-crafted filters on behavioral data (**Fig 7B**). For  
388 example, users may create and apply a filter on inter-animal distance or resident velocity, to automatically  
389 identify all frames in which feature values fall within a specified range.

390 BENTO also provides interfaces for several common analyses of neural activity, including event-triggered  
391 averaging, 2D linear projection of neural activity, and clustering of cells by their activity. Advanced users  
392 have the option to create additional custom analyses as plugins in the interface. BENTO is freely available  
393 on GitHub, and is supported by documentation and a user wiki.

394

## 395 **Use case 1: high-throughput social behavioral profiling of multiple genetic** 396 **mouse model lines**

397 Advances in human genetics, such as genome-wide association studies (GWAS), have led to the  
398 identification of multiple gene loci that may increase susceptibility to autism<sup>46,47</sup>. The laboratory mouse  
399 has been used as a system for studying “genocopies” of allelic variants found in humans, and dozens of  
400 mouse lines containing engineered autism-associated mutations have been produced in an effort to  
401 understand the effect of these mutations on neural circuit development and function<sup>5,48</sup>. While several  
402 lines show atypical social behaviors, it is unclear whether all lines share a similar behavioral profile, or  
403 whether different behavioral phenotypes are associated with different genetic mutations.

404 We collected and analyzed a 45-hour dataset of male-male social interactions using mice from five  
405 different lines: three lines that genocopy autism-associated mutations (*Chd8*<sup>49</sup>, *Cul3*<sup>50</sup>, and *Nlgn3*<sup>51</sup>), one  
406 inbred line that has previously been shown to exhibit atypical social behavior and is used as an autism  
407 “model” (BTBR<sup>20</sup>), and a C57Bl/6J control line. For each line, we collected behavior videos during ten-  
408 minute social interactions with a male intruder, and quantified expression of attack and close investigation

409 behaviors using MARS. In autism lines, we tested heterozygotes vs age-matched wild-type (WT)  
410 littermates; BTBR mice were tested alongside age-matched C57Bl/6J mice. Due to the need for contrasting  
411 coat-colors to distinguish interacting mouse pairs, all mice were tested with BalbC intruder males. Each  
412 mouse was tested using a repeated measures design (**Fig. 8A**): first in their home cage after group-housing  
413 with heterozygous and wild-type littermates, and again after two weeks of single-housing.

414 Consistent with previous studies, MARS annotations showed increased aggression in group-housed  
415 *Chd8*<sup>-/-</sup> mice relative to WT littermate controls (**Fig. 8B**; full statistical reporting in **Suppl. Table 2**). *Nlgn3*<sup>-/-</sup>  
416 mice were more aggressive than C57Bl/6J animals, consistent with previous work<sup>52</sup>, and showed a  
417 significant increase in aggression following single-housing. But, interestingly, there was not a statistically  
418 significant difference in aggression between single-housed *Nlgn3*<sup>-/-</sup> mice and their WT littermates, which  
419 were also aggressive. The increased aggression of WT littermates of *Nlgn3*<sup>-/-</sup> mice may be due to their  
420 genetic background (C57Bl6-SV129 hybrid rather than pure C57Bl/6), or could arise from the  
421 environmental influence of these mice being co-housed with aggressive heterozygote littermates<sup>53</sup>.

422 We also confirmed previous findings<sup>20</sup> that BTBR mice spend less time investigating intruder mice than  
423 C57Bl/6J control animals (**Fig. 8C**), and that the average duration of close investigation bouts was reduced  
424 (**Fig. 8E, left**). Using MARS's estimate of the intruder mouse's pose, we defined two anatomical boundaries  
425 on the intruder mouse's body: a "face-body boundary" midway between the nose and neck keypoints,  
426 and a "body-genital boundary" midway between the tail and the center of the hips. We used these  
427 boundaries to automatically label frames of close investigation as either face-, body-, or genital-directed  
428 investigation (**Fig 8D**). This relabeling revealed that in addition to showing shorter investigation bouts in  
429 general, the BTBR mice showed shorter bouts of face- and genital-directed investigation compared to  
430 C57Bl/6J controls, while the duration of body-directed investigation bouts was not significantly different  
431 from controls (**Fig 8E**). This finding may suggest a loss of preference for investigation of, or sensitivity to,  
432 socially relevant pheromonal cues in the BTBR inbred line.

433 Without automation of behavior annotation by MARS, analysis of body part-specific investigation would  
434 have required complete manual reannotation of the dataset, a prohibitively slow process. Our findings in  
435 BTBR mice therefore demonstrates the power of MARS behavior labels and pose features as a resource  
436 for exploratory analysis of behavioral data.

437

## 438 **Use case 2: finding neural correlates of mounting behavior**

439 The sensitivity of electrophysiological and 2-photon neural imaging methods to motion artifacts has  
440 historically required the recording of neural activity to be performed in animals that have been head-fixed  
441 or otherwise restrained. However, head-fixed animals cannot perform many naturalistic behaviors,  
442 including social behaviors. The emergence of novel technologies such as microendoscopic imaging and  
443 silicon probe recording has enabled the recording of neural activity in freely moving animals<sup>54</sup>, however  
444 these techniques still require animals to be fitted with a head-mounted recording device, typically  
445 tethered to an attached cable (**Fig. 9A-B**).

446 To demonstrate the utility of MARS and BENTO for these data, we analyzed data from a recent study in  
447 the Anderson lab<sup>55</sup>, in which a male *Esr1*<sup>+</sup> Cre mouse was implanted with a microendoscopic imaging

448 device targeting the medial preoptic area (MPOA), a hypothalamic nucleus implicated in social and  
449 reproductive behaviors<sup>55-57</sup>. We first used MARS to automatically detect bouts of close investigation and  
450 mounting while this mouse freely interacted with a female conspecific. Next, video, pose, and annotation  
451 data was loaded into BENTO, where additional social behaviors of interest were manually annotated.  
452 Finally, we re-loaded video, pose, and annotation data in BENTO alongside traces of neural activity  
453 extracted from the MPOA imaging data.

454 Using BENTO's Behavior-Triggered Average plugin, we visualized the activity of individual MPOA neurons  
455 when the animal initiated mounting behavior (**Fig. 9C**), and identified a subset of 28 imaged neurons  
456 whose activity was modulated by mounting. Finally, using a subset of these identified cells, we exported  
457 mount-averaged activity from the Behavior-Triggered Average plugin and visualized their activity as a  
458 heatmap (**Fig. 9D**). This analysis allowed us to quickly browse this imaging dataset and determine that  
459 multiple subtypes of mount-modulated neurons exist within the imaged MPOA population, with all  
460 analysis except for the final plotting in Figure 9D performed from within the BENTO user interface.

461

## 462 Discussion

463 Automated systems for accurate pose estimation are increasingly available to neuroscientists and have  
464 proven to be useful for measuring animal pose and motion in a number of studies<sup>58-61</sup>. However, pose  
465 alone does not provide sufficient insight into an animal's behavior. Together, MARS and BENTO provide  
466 an end-to-end tool for automated pose estimation and supervised social behavior classification in the  
467 widely-used resident-intruder assay, and links these analyses with a graphical user interface for the quick  
468 exploration and analysis of joint neural and behavioral datasets. MARS allows users to perform high-  
469 throughput screening of social behavior expression, and is robust to occlusion and motion from head-  
470 mounted recording devices and cables. The pre-trained version of MARS does not require users to collect  
471 and annotate their own keypoint annotations as training data, and runs out-of-the-box on established  
472 hardware<sup>20</sup>. For behavioral data collected in other settings, the MARS\_Developer repository allows users  
473 to fine-tune MARS's pose estimator and behavior classifiers with their own data. MARS\_Developer also  
474 allows users to train their own new behavior classifiers from annotations created within BENTO. Future  
475 versions of MARS\_Developer will incorporate our fast-learning semi-supervised behavior analysis tool  
476 TREBA<sup>62</sup>, to train behavior classifiers in arbitrary settings.

477 There is to date no field-wide consensus definition of attack, mounting, and investigation behaviors: the  
478 classifiers distributed with MARS reflect the careful annotations of one individual in the Anderson lab.  
479 MARS's support for classifier re-training allows labs to train MARS on their own annotation data, to  
480 contrast their "in-house" definitions of social behaviors of interest to those used in the MARS classifiers.  
481 Comparison of trained classifiers may help to identify differences in annotation style between individuals,  
482 to establish a clearer consensus definition of behaviors<sup>11</sup>.

483 MARS operates without requiring multiple cameras or specialized equipment such as a depth camera,  
484 unlike our previously published system<sup>20</sup>. MARS is also computationally distinct from our previous work:  
485 while Hong et al used a Matlab implementation of cascaded pose regression<sup>24</sup> to fit an ellipse to the body  
486 of each mouse (a form of blob-based tracking), MARS is built using the deep learning package Tensorflow

487 and performs true pose estimation, in that it predicts the location of individual anatomical landmarks on  
488 the bodies of the tracked mice. In terms of performance, MARS is also much more accurate and invariant  
489 to changes in lighting and to the presence of head-mounted cables, compared to our earlier effort.  
490 Eliminating the IR-based depth sensor simplifies data acquisition and speeds up processing, and also  
491 allows MARS to be used without creating IR artifacts during microendoscopic imaging.

492 Comparing pose and behavior annotations from multiple human annotators, we were able to quantify the  
493 degree of inter-human variability in both tasks, and found that in both cases MARS performs comparably  
494 to the best-performing human. This suggests that improving the quality of training data, for example by  
495 providing better visualizations and clearer instructions to human annotators, could help to further  
496 improve the accuracy of pose estimation and behavior classification tools such as MARS. Conversely, the  
497 inter-human variability in behavior annotation may reflect the fact that animal behavior is too complex  
498 and heterogeneous for behavior labels of “attack” and “close investigation” to be applied consistently by  
499 multiple annotators. It is unclear whether future behavior classification efforts with more granular action  
500 categories could reduce inter-human variability and lead to higher performance by automated classifiers,  
501 or whether more granular categories would cause only greater inter-annotator disagreement, while also  
502 requiring more annotation time to collect sufficient labeled training examples for each action.

503 Unsupervised approaches are a promising alternative to behavior quantification, and may eventually  
504 bypass the need for human input during behavior discovery<sup>29-31,63,64</sup>. While current efforts in unsupervised  
505 behavior discovery have largely been limited to single animals, the pose estimates and features produced  
506 by MARS could potentially prove useful for future investigations that identify behaviors of interest in a  
507 user-unbiased manner. Alternatively, unsupervised analysis of MARS pose features may help to reduce  
508 redundancy among features, potentially leading to a reduction in the amount of sample data required to  
509 train classifiers to detect new behaviors of interest. We have recently developed one self-supervised tool,  
510 called Trajectory Embedding for Behavior Analysis (TREBA) that uses learned embeddings of animal  
511 movements to learn more effective features for behavior classification<sup>62</sup>; support for TREBA feature  
512 learning will be incorporated into a future release of MARS\_Developer.

513 Neuroscience has seen an explosive proliferation of tools for automated pose estimation and behavior  
514 classification, distributed in accessible open-source packages that have fostered widespread  
515 adoption<sup>13,27,34,35,65</sup>. However, these tools still require users to provide their own labeled training data, and  
516 their performance still depends on training set size and quality. And while the annotation process post-  
517 training is made faster and more painless, each lab is still left to create its own definition for each behavior  
518 of interest, with no clear mechanisms in place in the community to standardize or compare classifiers. To  
519 address these issues, MARS provides a pre-trained pose estimation and behavior classification system,  
520 with publicly available, well-characterized training data. By this approach, MARS is intended to facilitate  
521 comparison of behavioral results between labs, fostering large-scale screening of social behaviors within  
522 a common analysis platform.

## 523 *Acknowledgements*

524 We are grateful to Grant Van Horn for providing the original TensorFlow implementation of the MSC-  
525 Multibox detection library, Matteo Ronchi for his pose error diagnosis code, and Mark Zylka for providing



526 the Cul3 and Chd8 mouse lines. Research reported in this publication was supported by the National  
527 Institute of Mental Health of the National Institutes of Health under Award Number R01MH123612 and  
528 5R01MH070053 (D.J.A.), K99MH108734 (M.Z.) and K99MH117264 (A.K.), and by the Human Frontier  
529 Science Program (T.K.), the Helen Hay Whitney Foundation (A.K.), the Simons Foundation Autism Research  
530 Initiative (D.J.A.) and the Gordon and Betty Moore Foundation (P.P). The content is solely the  
531 responsibility of the authors and does not necessarily represent the official views of the National Institutes  
532 of Health.

533 **Works Cited**

- 534 1 Remedios, R. *et al.* Social behaviour shapes hypothalamic neural ensemble representations of  
535 conspecific sex. *Nature* **550**, 388-392, doi:10.1038/nature23885 (2017).
- 536 2 Li, Y. *et al.* Neuronal Representation of Social Information in the Medial Amygdala of Awake  
537 Behaving Mice. *Cell* **171**, 1176-1190 e1117, doi:10.1016/j.cell.2017.10.015 (2017).
- 538 3 Falkner, A. L. *et al.* Hierarchical representations of aggression in a hypothalamic-midbrain circuit.  
539 *Neuron* (2020).
- 540 4 Yang, M., Silverman, J. L. & Crawley, J. N. Automated three-chambered social approach task for  
541 mice. *Current protocols in neuroscience* **56**, 8.26. 21-28.26. 16 (2011).
- 542 5 Silverman, J. L., Yang, M., Lord, C. & Crawley, J. N. Behavioural phenotyping assays for mouse  
543 models of autism. *Nature Reviews Neuroscience* **11**, 490-502 (2010).
- 544 6 Winslow, J. T. Mouse social recognition and preference. *Current protocols in neuroscience* **22**,  
545 8.16. 11-18.16. 16 (2003).
- 546 7 Zelikowsky, M. *et al.* The Neuropeptide Tac2 Controls a Distributed Brain State Induced by  
547 Chronic Social Isolation Stress. *Cell* **173**, 1265-1279 e1219, doi:10.1016/j.cell.2018.03.037  
548 (2018).
- 549 8 Shemesh, Y. *et al.* High-order social interactions in groups of mice. *Elife* **2**, e00759 (2013).
- 550 9 Branson, K., Robie, A. A., Bender, J., Perona, P. & Dickinson, M. H. High-throughput ethomics in  
551 large groups of Drosophila. *Nat Methods* **6**, 451-457, doi:10.1038/nmeth.1328 (2009).
- 552 10 Thurmond, J. B. Technique for producing and measuring territorial aggression using laboratory  
553 mice. *Physiology & behavior* **14**, 879-881 (1975).
- 554 11 Sun, J. J. *et al.* The Multi-Agent Behavior Dataset: Mouse Dyadic Social Interactions. *arXiv*  
555 *preprint arXiv:2104.02710* (2021).
- 556 12 Lin, T.-Y. *et al.* in *European conference on computer vision*. 740-755 (Springer).
- 557 13 Mathis, A. *et al.* DeepLabCut: markerless pose estimation of user-defined body parts with deep  
558 learning. *Nat Neurosci* **21**, 1281-1289, doi:10.1038/s41593-018-0209-y (2018).
- 559 14 Szegedy, C., Ioffe, S., Vanhoucke, V. & Alemi, A. A. in *Thirty-first AAAI conference on artificial*  
560 *intelligence*.
- 561 15 Redmon, J., Divvala, S., Girshick, R. & Farhadi, A. in *Proceedings of the IEEE conference on*  
562 *computer vision and pattern recognition*. 779-788.
- 563 16 He, K., Gkioxari, G., Dollár, P. & Girshick, R. in *Proceedings of the IEEE international conference*  
564 *on computer vision*. 2961-2969.
- 565 17 Noldus, L. P., Spink, A. J. & Tegelenbosch, R. A. EthoVision: a versatile video tracking system for  
566 automation of behavioral experiments. *Behavior Research Methods, Instruments, & Computers*  
567 **33**, 398-414 (2001).
- 568 18 Ohayon, S., Avni, O., Taylor, A. L., Perona, P. & Roian Egnor, S. E. Automated multi-day tracking  
569 of marked mice for the analysis of social behaviour. *J Neurosci Methods* **219**, 10-19,  
570 doi:10.1016/j.jneumeth.2013.05.013 (2013).
- 571 19 Pérez-Escudero, A., Vicente-Page, J., Hinz, R. C., Arganda, S. & De Polavieja, G. G. idTracker:  
572 tracking individuals in a group by automatic identification of unmarked animals. *Nature methods*  
573 **11**, 743-748 (2014).
- 574 20 Hong, W. *et al.* Automated measurement of mouse social behaviors using depth sensing, video  
575 tracking, and machine learning. *Proceedings of the National Academy of Sciences* **112**, E5351-  
576 E5360 (2015).
- 577 21 Gal, A., Saragosti, J. & Kronauer, D. J. C. anTraX: high throughput video tracking of color-tagged  
578 insects. *bioRxiv*, 2020.2004.2029.068478, doi:10.1101/2020.04.29.068478 (2020).

- 579 22 Toshev, A. & Szegedy, C. in *Proceedings of the IEEE conference on computer vision and pattern*  
580 *recognition*. 1653-1660.
- 581 23 Dankert, H., Wang, L., Hoopfer, E. D., Anderson, D. J. & Perona, P. Automated monitoring and  
582 analysis of social behavior in *Drosophila*. *Nat Methods* **6**, 297-303, doi:10.1038/nmeth.1310  
583 (2009).
- 584 24 Dollár, P., Welinder, P. & Perona, P. in *2010 IEEE Computer Society Conference on Computer*  
585 *Vision and Pattern Recognition*. 1078-1085 (IEEE).
- 586 25 Alp Güler, R., Neverova, N. & Kokkinos, I. in *Proceedings of the IEEE Conference on Computer*  
587 *Vision and Pattern Recognition*. 7297-7306.
- 588 26 Pereira, T. D. *et al.* Fast animal pose estimation using deep neural networks. *bioRxiv*,  
589 doi:10.1101/331181 (2018).
- 590 27 Graving, J. M. *et al.* DeepPoseKit, a software toolkit for fast and robust animal pose estimation  
591 using deep learning. *Elife* **8**, doi:10.7554/eLife.47994 (2019).
- 592 28 Sturman, O. *et al.* Deep learning based behavioral analysis enables high precision rodent  
593 tracking and is capable of outperforming commercial solutions. *bioRxiv* (2020).
- 594 29 Wiltchko, A. B. *et al.* Mapping sub-second structure in mouse behavior. *Neuron* **88**, 1121-1135  
595 (2015).
- 596 30 Berman, G. J., Choi, D. M., Bialek, W. & Shaewitz, J. W. Mapping the stereotyped behaviour of  
597 freely moving fruit flies. *Journal of The Royal Society Interface* **11**, 20140672 (2014).
- 598 31 Vogelstein, J. T. *et al.* Discovery of brainwide neural-behavioral maps via multiscale  
599 unsupervised structure learning. *Science* **344**, 386-392 (2014).
- 600 32 Giancardo, L. *et al.* Automatic visual tracking and social behaviour analysis with multiple mice.  
601 *PLoS One* **8**, e74557, doi:10.1371/journal.pone.0074557 (2013).
- 602 33 de Chaumont, F. *et al.* Computerized video analysis of social interactions in mice. *Nat Methods*  
603 **9**, 410-417, doi:10.1038/nmeth.1924 (2012).
- 604 34 Nilsson, S. R. *et al.* Simple Behavioral Analysis (SimBA): an open source toolkit for computer  
605 classification of complex social behaviors in experimental animals. *BioRxiv* (2020).
- 606 35 Pereira, T. D. *et al.* SLEAP: multi-animal pose tracking. *bioRxiv* (2020).
- 607 36 Kabra, M., Robie, A. A., Rivera-Alba, M., Branson, S. & Branson, K. JAABA: interactive machine  
608 learning for automatic annotation of animal behavior. *Nature methods* **10**, 64 (2013).
- 609 37 Monfort, M. *et al.* Moments in time dataset: one million videos for event understanding. *IEEE*  
610 *transactions on pattern analysis and machine intelligence* **42**, 502-508 (2019).
- 611 38 Tran, D., Bourdev, L., Fergus, R., Torresani, L. & Paluri, M. in *Proceedings of the IEEE*  
612 *international conference on computer vision*. 4489-4497.
- 613 39 Yang, Y. & Ramanan, D. Articulated human detection with flexible mixtures of parts. *IEEE*  
614 *transactions on pattern analysis and machine intelligence* **35**, 2878-2890 (2012).
- 615 40 Szegedy, C., Reed, S., Erhan, D., Anguelov, D. & Ioffe, S. Scalable, high-quality object detection.  
616 *arXiv preprint arXiv:1412.1441* (2014).
- 617 41 Newell, A., Yang, K. & Deng, J. in *European Conference on Computer Vision*. 483-499 (Springer).
- 618 42 Ruggero Ronchi, M. & Perona, P. in *Proceedings of the IEEE international conference on*  
619 *computer vision*. 369-378.
- 620 43 Xiao, B., Wu, H. & Wei, Y. in *Proceedings of the European conference on computer vision (ECCV)*.  
621 466-481.
- 622 44 Chen, T. & Guestrin, C. in *Proceedings of the 22nd acm sigkdd international conference on*  
623 *knowledge discovery and data mining*. 785-794.
- 624 45 Burgos-Artizzu, X. P., Dollár, P., Lin, D., Anderson, D. J. & Perona, P. in *2012 IEEE Conference on*  
625 *Computer Vision and Pattern Recognition*. 1322-1329 (IEEE).

- 626 46 Grove, J. *et al.* Identification of common genetic risk variants for autism spectrum disorder.  
627 *Nature genetics* **51**, 431-444 (2019).
- 628 47 O’Roak, B. J. *et al.* Sporadic autism exomes reveal a highly interconnected protein network of de  
629 novo mutations. *Nature* **485**, 246-250 (2012).
- 630 48 Moy, S. & Nadler, J. Advances in behavioral genetics: mouse models of autism. *Molecular*  
631 *psychiatry* **13**, 4-26 (2008).
- 632 49 Katayama, Y. *et al.* CHD8 haploinsufficiency results in autistic-like phenotypes in mice. *Nature*  
633 **537**, 675-679 (2016).
- 634 50 Dong, Z. *et al.* CUL3 deficiency causes social deficits and anxiety-like behaviors by impairing  
635 excitation-inhibition balance through the promotion of cap-dependent translation. *Neuron* **105**,  
636 475-490. e476 (2020).
- 637 51 Tabuchi, K. *et al.* A neuroligin-3 mutation implicated in autism increases inhibitory synaptic  
638 transmission in mice. *science* **318**, 71-76 (2007).
- 639 52 Burrows, E. L. *et al.* A neuroligin-3 mutation implicated in autism causes abnormal aggression  
640 and increases repetitive behavior in mice. *Mol Autism* **6**, 62, doi:10.1186/s13229-015-0055-7  
641 (2015).
- 642 53 Kalbassi, S., Bachmann, S. O., Cross, E., Robertson, V. H. & Baudouin, S. J. Male and Female Mice  
643 Lacking Neuroligin-3 Modify the Behavior of Their Wild-Type Littermates. *eNeuro* **4**,  
644 doi:10.1523/ENEURO.0145-17.2017 (2017).
- 645 54 Resendez, S. L. *et al.* Visualization of cortical, subcortical and deep brain neural circuit dynamics  
646 during naturalistic mammalian behavior with head-mounted microscopes and chronically  
647 implanted lenses. *Nat Protoc* **11**, 566-597, doi:10.1038/nprot.2016.021 (2016).
- 648 55 Karigo, T. *et al.* Hypothalamic control of same- v.s opposite-sex mounting behavior in mice.  
649 *Nature* (in press).
- 650 56 Wei, Y. C. *et al.* Medial preoptic area in mice is capable of mediating sexually dimorphic  
651 behaviors regardless of gender. *Nat Commun* **9**, 279, doi:10.1038/s41467-017-02648-0 (2018).
- 652 57 Wu, Z., Autry, A. E., Bergan, J. F., Watabe-Uchida, M. & Dulac, C. G. Galanin neurons in the  
653 medial preoptic area govern parental behaviour. *Nature* **509**, 325-330,  
654 doi:10.1038/nature13307 (2014).
- 655 58 Datta, S. R., Anderson, D. J., Branson, K., Perona, P. & Leifer, A. Computational neuroethology: a  
656 call to action. *Neuron* **104**, 11-24 (2019).
- 657 59 Pereira, T. D., Shaevitz, J. W. & Murthy, M. Quantifying behavior to understand the brain. *Nature*  
658 *neuroscience* **23**, 1537-1549 (2020).
- 659 60 Mathis, M. W. & Mathis, A. Deep learning tools for the measurement of animal behavior in  
660 neuroscience. *Current opinion in neurobiology* **60**, 1-11 (2020).
- 661 61 Dell, A. I. *et al.* Automated image-based tracking and its application in ecology. *Trends in ecology*  
662 *& evolution* **29**, 417-428 (2014).
- 663 62 Sun, J. J. *et al.* in *Proceedings of the IEEE/CVF Conference on Computer Vision and Pattern*  
664 *Recognition*. 2876-2885.
- 665 63 Luxem, K., Fuhrmann, F., Kürsch, J., Remy, S. & Bauer, P. Identifying Behavioral Structure from  
666 Deep Variational Embeddings of Animal Motion. *bioRxiv* (2020).
- 667 64 Hsu, A. I. & Yttri, E. A. B-SOiD, an open-source unsupervised algorithm for identification and fast  
668 prediction of behaviors. *Nature Communications* **12**, 1-13 (2021).
- 669 65 Walter, T. & Couzin, I. D. TRex, a fast multi-animal tracking system with markerless  
670 identification, and 2D estimation of posture and visual fields. *Elife* **10**, e64000 (2021).

671

## 1 Methods

### 2 Data collection

#### 3 Animals

4 *Chd8*<sup>+/-</sup> and *Cul3*<sup>+/-</sup> mice were obtained from Dr. Mark Zylka, BTBR and *Nlgn3*<sup>+/-</sup> mice were obtained from  
5 Jackson Labs (BTBR Stock No 2282, *Nlgn3* Stock No 8475), and wild-type C57Bl/6J and BALB/c mice were  
6 obtained from Charles River. All mice were received at 6-10 weeks of age, and were maintained in the  
7 Caltech animal facility, where they were housed with three same-sex littermates (unless otherwise noted)  
8 on a reverse 11-hour dark 13-hour light cycle with food and water *ad libitum*. Behavior was tested during  
9 the dark cycle. All experimental procedures involving the use of live animals or their tissues were  
10 performed in accordance with the NIH guidelines and approved by the Institutional Animal Care and Use  
11 Committee (IACUC) and the Institutional Biosafety Committee at the California Institute of Technology  
12 (Caltech).

#### 13 The resident-intruder assay

14 Testing for social behaviors using the resident-intruder assay<sup>1</sup> was performed as in <sup>2-5</sup>. Experimental mice  
15 (“residents”) were transported in their homecage (with cagemates removed) to a behavioral testing room,  
16 and acclimatized for 5-15 minutes. Homecages were then inserted into a custom-built hardware setup<sup>3</sup>  
17 with infrared video captured at 30 fps from top- and front-view cameras (Point Grey Grasshopper3)  
18 recorded at 1024x570 (top) and 1280x500 (front) pixel resolution using StreamPix video software (NorPix).  
19 Following two further minutes of acclimatization, an unfamiliar group-housed male or female BALB/c  
20 mouse (“intruder”) was introduced to the cage, and animals were allowed to freely interact for a period  
21 of approximately 10 minutes. BALB/c mice are used as intruders for their white coat color (simplifying  
22 identity tracking), as well as their relatively submissive behavior, which reduces the likelihood of intruder-  
23 initiated aggression. Social behaviors were manually scored on a frame-by-frame basis, as described in  
24 the “Mouse behavior annotation” section below.

25 Videos for training of MARS detector, pose estimator, and behavior classifier were selected from  
26 previously performed experiments in the Anderson lab. In approximately half of videos in the training  
27 data, mice were implanted with a cranial cannula, or with a head-mounted miniaturized microscope  
28 (nVista, Inscopix) or optical fiber for optogenetics or fiber photometry, attached to a cable of varying color  
29 and thickness. Surgical procedures for these implantations can be found in <sup>2,6,7</sup>.

#### 30 Screening of autism-associated mutation lines

31 Group-housed heterozygous male mice from mouse lines with autism-associated mutations (*Chd8*<sup>+/-</sup>,  
32 *Cul3*<sup>+/-</sup>, BTBR, and *Nlgn3*<sup>+/-</sup> mice, plus C57Bl/6J control mice), were first tested in a standard resident-  
33 intruder assay as outlined above. To control for differences in rearing between lines, an equal number of  
34 wild-type littermate male mice from each line were tested on the same day; for the inbred BTBR strain,  
35 C57Bl/6J mice were used as controls. Between 8 and 10 animals were tested from each condition,  
36 alongside an equal number of controls (*Chd8*<sup>+/-</sup>: 10 het + 10 control; *Cul3*<sup>+/-</sup>: 8 het + 7 control; BTBR: 10  
37 mice + 10 C57Bl/6J control; *Nlgn3*<sup>+/-</sup>: 10 het + 9 control; C57Bl/6J 12 mice). This sample size range was  
38 chosen to be in line with similar Resident-Intruder experiments in the Anderson lab.

39 *Nlgn3*<sup>+/-</sup> (plus wild-type littermate controls), BTBR, and C57Bl/6J were tested at 11-13 weeks of age; *Cul3*<sup>+/-</sup>  
40 and *Chd8*<sup>+/-</sup> mice (plus wild-type littermate controls) were tested at 35-50 weeks of age as previous studies  
41 had noted no clear aggression phenotype in younger animals<sup>8</sup>. Following the resident-intruder assay, mice

42 were housed in social isolation (one mouse per cage, all cage conditions otherwise identical to those of  
43 group-housed animals) for at least 2 weeks, and then tested again in the resident-intruder assay with an  
44 unfamiliar male intruder. Two *Nlgn3* single-housed het animals were excluded from analysis due to  
45 corruption of behavior videos by acquisition software. One *Chd8* GH wt video was excluded due to  
46 uncharacteristic aggression by the BalbC intruder mouse.

47 Videos of social interactions were scored on a frame-by-frame basis for mounting, attack, and close  
48 investigation behavior using MARS; select videos were also manually annotated for these three behaviors  
49 to confirm the accuracy of MARS classifier output. Manual annotation of this dataset was performed  
50 blinded to animal genotype.

## 51 [Statistical analysis of autism-associated mutation lines](#)

52 Testing for effect of mouse cohort (heterozygous mutant or strain vs wildtype controls) on social behavior  
53 expression was performed using a two-tailed t-test. Because the same animals were tested in both group-  
54 housed (GH) and singly housed (SH) conditions, testing for effect of housing on social behavior expression  
55 was performed using a paired two-tailed t-test. The values tested (total time spent engaging in behavior,  
56 and average duration of behavior bouts) are approximately Gaussian, justifying the use of the t-test in this  
57 analysis.

## 58 [Mouse pose annotation](#)

59 Part keypoint annotations are common in computer vision, and are included in datasets such as Microsoft  
60 COCO<sup>9</sup>, MPII human pose<sup>10</sup>, and CUB-200-2011<sup>11</sup>; they also form the basis of markerless pose estimation  
61 systems such as DeepLabCut<sup>12</sup>, LEAP<sup>13</sup>, and DeepPoseKit<sup>14</sup>. For MARS, we defined nine anatomical  
62 keypoints in the top-view video (the nose, ears, base of neck, hips, and tail base, midpoint, and endpoint),  
63 and 13 keypoints in the front-view video (top-view keypoints plus the four paws). The tail mid- and  
64 endpoint annotations were subsequently discarded for training of MARS, leaving seven keypoints in the  
65 top-view and 11 in the front-view (as in **Figure 2a-b**).

66 To create a data set of video frames for labeling, we sampled 64 videos from several years of experimental  
67 projects in the Anderson lab, collected by multiple lab members (these videos were distinct from the  
68 videos used for behavior classification.) While all videos were acquired in our standardized hardware  
69 setup, we observed some variability in lighting and camera contrast across the dataset; examples are  
70 shown in **Figure 1b**. We extracted a set of 15,000 individual frames each from the top- and front-view  
71 cameras, giving a total of 2,700,000 individual keypoint annotations (15,000 frames x (7 top-view + 11  
72 front-view keypoints per mouse) x 2 mice x 5 annotators). 5,000 of the extracted frames included resident  
73 mice with a fiberoptic cable, cannula, or head-mounted microendoscope with cable.

74 We used the crowdsourcing platform Amazon Mechanical Turk (AMT) to obtain manual annotations of  
75 pose keypoints. AMT workers were provided with written instructions and illustrated examples of each  
76 keypoint, and instructed to infer the location of occluded keypoints. Frames were assigned randomly to  
77 AMT workers, and were provided as images (that is, with no temporal information.) Each worker was  
78 allowed to annotate as many frames as desired, until the labeling job was completed. Python scripts for  
79 creation of AMT labeling jobs and post-processing of labeled data are included in the MARS\_Developer  
80 repository.

81 To compensate for annotation noise, each keypoint was annotated by five AMT workers, and a “ground  
82 truth” location for that keypoint was defined as the median across annotators (see next section) (**Figure**  
83 **2c-d**). The median was computed separately in the x and y dimensions. Annotations of individual workers  
84 were also post-processed to correct for common mistakes, such as confusing the left and right sides of



85 the animals. Another common worker error was to mistake the top of the head-mounted microendoscope  
86 for the resident animal's nose; we visually screened for these errors and corrected them manually.

### 87 [Consolidating data across annotators](#)

88 We evaluated four approaches for consolidating annotator estimates of keypoint locations: the mean,  
89 median, geometric median<sup>15</sup>, and medoid, using simulated data. We simulated a 10,000-frame dataset  
90 with n=5 simulated clicks per frame, in which clicks were scattered around a ground-truth location with  
91 either Normal or standard Cauchy-distributed noise; the latter was selected for its heavy tail compared  
92 to the Normal distribution. Across 100 instantiations of this simulation, the mean error between  
93 estimated keypoint location and ground truth was as follows (mean  $\pm$  STD across 100 simulations):

| Noise type | Mean                | Median                           | Geom. median                        | Medoid              |
|------------|---------------------|----------------------------------|-------------------------------------|---------------------|
| Normal     | 0.561 $\pm$ 0.00313 | 0.671 $\pm$ 0.00376              | <b>0.646<math>\pm</math>0.00367</b> | 0.773 $\pm$ 0.00444 |
| Cauchy     | 20.6 $\pm$ 42.4     | <b>1.12<math>\pm</math>0.011</b> | 1.13 $\pm$ 0.0121                   | 1.43 $\pm$ 0.0125   |

94

95 While averaging annotator clicks works well for normally distributed data, it fails when click locations  
96 have a heavy tail, which can occur when there is variation in annotator skill or level of focus. We  
97 selected the median for use in this study, as it performs comparably to the geometric median while  
98 being simpler to implement and faster to compute.

### 99 [Bounding box annotation](#)

100 For both top- and front-view video, we estimated a bounding box by finding the minimal rectangle that  
101 contained all seven (top) or eleven (front) pose keypoints. (For better accuracy in the detection and pose  
102 estimation we discarded the middle and end keypoints of the tail.) We then padded this minimal rectangle  
103 by a constant factor to prevent cutoff of body parts at the rectangle border.

### 104 [Mouse behavior annotation](#)

105 We created an approximately 14-hour dataset of behavior videos, compiled across recent experiments  
106 performed by a member of the Anderson lab; this same lab member ("Human 1" from the multi-annotator  
107 dataset) annotated all videos on a frame-by-frame basis. The videos in this dataset were largely distinct  
108 from the videos sampled to create the 15,000-frame pose dataset. Annotators were provided with  
109 simultaneous top- and front-view video of interacting mice, and scored every video frame for close  
110 investigation, attack, and mounting, using the criteria described below. In some videos, additional  
111 behaviors were also annotated- when this occurred, these behaviors were assigned to one of close  
112 investigation, attack, mounting, or "other" for the purpose of training classifiers. Definitions of these  
113 additional behaviors are listed underneath the behavior to which they were assigned. All behavior  
114 definitions reflect an Anderson lab consensus, although as evidenced by our multi-annotator comparison,  
115 even such a consensus does not prevent variability in annotation style across individuals. Annotation was  
116 performed either in Bento or using a previously developed custom Matlab interface<sup>16</sup>.

117 **Close investigation:** resident (black) mouse is in close contact with the intruder (white) and is actively  
118 sniffing the intruder anywhere on its body or tail. Active sniffing can usually be distinguished from passive  
119 orienting behavior by head bobbing/movements of the resident's nose.

120 Other behaviors converted to the "close investigation" label:

- 121 • **Sniff face:** resident investigation of the intruder's face (typically eyes and snout).

122 • **Sniff genitals:** resident investigation of the intruder’s anogenital region, often occurs by shoving  
123 of the resident’s snout underneath the intruder’s tail.

124 • **Sniff body:** resident investigation of the intruder’s body, anywhere away from the face or genital  
125 regions.

126 • **Attempted attack:** this behavior was only annotated in a small subset of videos, and was grouped  
127 with investigation upon visual investigation of annotated bouts and comparison to annotations in  
128 other videos. Intruder is in a defensive posture (standing on hind legs, often facing the resident)  
129 to protect itself from attack, and resident is close to the intruder, either circling or rearing with  
130 front paws out towards/on the intruder, accompanied by investigation. Typically follows or is  
131 interspersed with bouts of actual attack, however the behavior itself more closely resembles  
132 investigation.

133 • **Attempted mount (or attempted dom mount):** this behavior was only annotated in a small subset  
134 of videos, and was grouped with investigation upon visual investigation of annotated bouts and  
135 comparison to annotations in other videos. Resident attempts to climb onto or mount another  
136 animal, often accompanied by investigation. Palpitations with forepaws and pelvic thrusts may be  
137 present, but the resident is not aligned with the body of the intruder mouse or the intruder mouse  
138 may be unreceptive and still moving.

139 **Attack:** high-intensity behavior in which the resident is biting or tussling with the intruder, including  
140 periods between bouts of biting/tussling during which the intruder is jumping or running away and the  
141 resident is in close pursuit. Pauses during which resident/intruder are facing each other (typically while  
142 rearing) but not actively interacting should not be included.

143 **Mount:** copulatory behavior in which the resident is hunched over the intruder, typically from the rear,  
144 and grasping the sides of the intruder using forelimbs (easier to see on the Front camera). Early-stage  
145 copulation is accompanied by rapid pelvic thrusting, while later-stage copulation (sometimes annotated  
146 separately as intromission) has a slower rate of pelvic thrusting with some pausing: for the purpose of this  
147 analysis, both behaviors should be counted as mounting, however periods where the resident is climbing  
148 on the intruder but not attempting to grasp the intruder or initiate thrusting should not.

149 Other behaviors converted to the “mount” label:

150 • **Intromission:** late stage copulatory behavior that occurs after mounting, with a slower rate of  
151 pelvic thrusting. Occasional pausing between bouts of thrusting are still counted as intromission.

152 • **Dom mount (or male-directed mounting):** this behavior was only annotated in a small subset of  
153 videos. Visually similar behavior to mounting, however typically directed towards a male intruder.  
154 The primary feature that distinguishes this behavior from mounting is an absence of ultrasonic  
155 vocalizations; bouts are also typically much shorter in duration, and terminated by the intruder  
156 attempting to evade the resident.

157 **Other:** behaviors that were annotated in some videos but not included in any of the above categories.

158 • **Approach:** resident orients and walks toward a typically stationary intruder, typically followed by  
159 periods of close investigation. Approach does not include more high-intensity behavior during  
160 which the intruder is attempting to evade the resident, which is instead classified as chase.

161 • **Chase:** resident is closely following the intruder around the home cage, while the intruder  
162 attempts to evade the resident. Typically interspersed with attempted mount or close  
163 investigation. In aggressive encounters, short periods of high intensity chasing between periods

164 of attack are still labeled as attack (not chase), while longer periods of chasing that do not include  
165 further attempts to attack are labeled as chasing.

- 166 • **Grooming:** usually in a sitting position, the mouse will lick its fur, groom with the forepaws, or  
167 scratch with any limb.

## 168 Design of behavior training, validation, and test sets

169 Videos were randomly assigned to train/validation/test sets by resident mouse identity, that is all videos  
170 of a given resident mouse were assigned to the same dataset. This practice is preferable to random  
171 assignment by video frame, because the latter can lead to temporally adjacent (and hence highly  
172 correlated) frames being distributed into training and test sets, causing severe overestimation of  
173 classifier accuracy. (For example, in 5-fold cross-validation with train/test set assignments randomized  
174 by frame, 96% of test-set frames will have an immediately neighboring frame in the training set.) In  
175 contrast, randomization by animal identity ensures that we do not overestimate the accuracy of MARS  
176 classifiers, and best reflects the expected accuracy end-users can expect when recording under  
177 comparable conditions, as the videos in the test set are from mice that MARS has never encountered  
178 before.

179 Note that because data were randomized by animal identity, relative frequencies of behaviors show  
180 some variation between training, validation, and test sets. Furthermore, because some videos (most  
181 often miniscope experiments) were annotated in a more granular manner than others, some sets (e.g.  
182 test set 1) are dominated by attack/mount/sniff annotations, while other sets include more annotations  
183 from other behaviors.

## 184 Behavior annotation by multiple individuals

185 For our analysis of inter-annotator variability in behavior scoring, we provided a group of graduate  
186 students, postdocs, and technicians in the Anderson lab with the descriptions of close investigation,  
187 mounting, and attack given above, and instructed them to score a set of ten resident-intruder videos, all  
188 taken from unoperated mice. Annotators were given front- and top-view video of social interactions, and  
189 scored behavior using either Bento or the Caltech Behavior Annotator<sup>16</sup>, both of which support  
190 simultaneous display of front- and top-view video and frame-by-frame browsing and scoring. All but one  
191 annotator (Human 4) had previous experience scoring mouse behavior videos; Human 4 had previous  
192 experience scoring similar social behaviors in flies.

193 When comparing human annotations to “annotator median”, each annotator was compared to the  
194 median of the remaining annotators. When taking the median of six annotators, a frame was considered  
195 positive for a given behavior if at least three out of six annotators labeled it as positive.

## 196 The MARS pipeline

### 197 Overview

198 MARS processes videos in three steps. First, videos are fed frame-by-frame into detection and pose  
199 estimation neural networks (details in following sections.) Frames are loaded into a queue and passed  
200 through a set of six functions: detection pre-processing, detection, detection post-processing, pose pre-  
201 processing, pose estimation, and pose post-processing; output of each function is passed into an input  
202 queue for the next. MARS uses multithreading to allow each stage in the detection and pose estimation  
203 pipeline to run independently on its queued frames, reducing processing time. Pose estimates and  
204 bounding boxes are saved every 2000 frames into a json file.

205 Second, following pose estimation, MARS extracts a set of features from estimated poses and the  
206 original tracked video (for pixel-change features; details in following sections.) The MARS interface  
207 allows users to extract several versions of features, however this paper focuses only on the “Top”  
208 version of features as it requires only top-view video input. Other tested feature sets, which combined  
209 the 270 MARS features with additional features extracted from front-view video, showed little  
210 improvement in classifier performance; these feature sets are still provided as options in the MARS user  
211 interface for potential future applications. The 270 MARS features are extracted and saved as .npz and  
212 .mat files (for use with MARS and Bento respectively). MARS next applies temporal windowing to these  
213 features (see following sections) and saves them as separate .npz and .mat files with a “\_wnd” suffix.

214 Third, following feature extraction, MARS loads the windowed version of features, and uses these as  
215 input to a set of behavior classifiers (details in following sections.) The output of behavior classifiers is  
216 saved as a .txt file using the Caltech Behavior Annotator format. In addition, MARS generates an Excel  
217 file that can be used to load video, annotations, and pose estimates into Bento.

## 218 [Mouse detection using the Multi-Scale Convolutional Multibox detector](#)

219 We used the multi-scale convolutional MultiBox (MSC-MultiBox)<sup>17,18</sup> approach to train a pair of deep  
220 neural networks to detect the black and white mice using our 15,000 frame bounding box annotation  
221 dataset. Specifically, we used the Inception-Resnet-v2 architecture<sup>19</sup> with ImageNet pre-trained weights,  
222 trained using a previously published implementation of MSC-MultiBox for Tensorflow  
223 (<https://github.com/gvanhorn38/multibox>).

224 Briefly, MSC-MultiBox computes a short list of up to K possible object detections proposal (bounding  
225 boxes) and associated confidence scores denoting the likelihood of that box containing a target object, in  
226 this case the black or white mouse. During training, MSC-MultiBox seeks to optimize location and  
227 maximize confidence scores of predicted bounding boxes that best match the ground truth, while  
228 minimizing confidence scores of predicted bounding boxes that do not match the ground truth. Bounding  
229 box location is encoded as the coordinates of the box’s upper-left and lower-right corners, normalized  
230 with respect to the image dimensions; confidence scores are scaled between 0 (lowest) and 1 (highest).  
231 Once we have the predicted bounding box proposals and confidence score we used NMS (non-maximum  
232 suppression) to select the bounding box proposal that best matches with the ground truth.

233 During training, we augmented data with random color variation and left/right flips. We used a learning  
234 rate of 0.01, decayed exponentially by 0.94 every 4 epochs, with an RMSProp optimizer<sup>20</sup> with  
235 momentum and decay both set to 0.99 and batch size of 4. Video frames are resized to 299x299 during  
236 both training and inference. The model was trained on an 8-core Intel i7-6700K CPU with 32GB RAM and  
237 an 8GB GTX 1080 GPU. All parameters used during training are published online in the detection model  
238 config\_train.yaml file published in the MARS\_Developer repository at  
239 [github.com/neuroecology/MARS\\_Developer](https://github.com/neuroecology/MARS_Developer).

## 240 [Detector evaluation](#)

241 Detectors were trained on 12,750 frames from our pose annotation data set, validated using 750 frames,  
242 and evaluated on the remaining 1,500 held-out frames, which were randomly sampled from the data set.

243 Model evaluation was performed using the COCO API<sup>9</sup>. We evaluated performance of the MSC-Mutibox  
244 detector by computing the intersection-over-union (IoU) between estimated and human-annotated  
245 bounding boxes, defined as the area of the intersection of the human-annotated and estimated bounding

246 boxes, divided by the area of their union. Precision/recall curves (PR curves) were plotted based on the  
247 fraction of MSC-Multibox detected bounding boxes with an IoU > X, for X in (0.5, 0.75, 0.85, 0.9, 0.95).

## 248 Pose estimation

249 Following the detection step (above), we use the Stacked Hourglass Network architecture<sup>21</sup> to estimate  
250 the pose of each mouse in terms of a set of anatomical keypoints (seven keypoints in top-view videos and  
251 eleven keypoints in front-view videos) on our 15,000 frame keypoint annotation dataset. We selected the  
252 Stacked Hourglass architecture for its high performance on human pose estimation tasks. The network's  
253 repeated "hourglass" modules shrink an input image to a low resolution, then up-samples it while  
254 combining it with features passed via skip connections; representations from multiple scaled versions of  
255 the image are thus combined to infer keypoint location. We find that the Stacked Hourglass Network is  
256 robust to partial occlusion of the animals, using the visible portion of a mouse's body to infer the location  
257 of parts that are hidden.

258 To construct the input to the Stacked Hourglass Network, MARS crops each video frame to the bounding  
259 box of a given mouse plus an extra 65% width and height, pad the resulting image with zero-value pixels  
260 to make it square, and resize to 256x256 pixels. Because the Stacked Hourglass Network converts an input  
261 image to a heatmap predicting the probability of a target keypoint being present at each pixel, during  
262 network training we constructed training heatmaps as 2D Gaussians with standard deviation of 1px  
263 centered on each annotator-provided keypoint. During inference on user data, MARS takes the maximum  
264 value of the generated heatmap to be the keypoint's location. We trained a separate model for pose  
265 estimation in front- vs top-view videos, but for each view the same model was used for both the black  
266 and the white mouse.

267 To improve generalizability of MARS pose estimation, we used several data augmentation manipulations  
268 to expand the effective size of our training set, including random blurring ( $p=0.15$ , Gaussian blur with  
269 standard deviation of 1 or 2 pixels), additive Gaussian noise (pixelwise across image with  $p=0.15$ ),  
270 brightness/contrast/gamma distortion ( $p=0.5$ ), and jpeg artifacts ( $p=0.15$ ), random rotation ( $p=1$ , angle  
271 uniform between 0 and 180), random padding of the bounding box and random horizontal and vertical  
272 flipping ( $p=0.5$  each).

273 During training, we used an initial learning rate of 0.00025, fixed learning rate decay by a factor of 0.2  
274 every 33 epochs to a minimum learning rate of 0.0001, and batch size of 8 (all parameters were based on  
275 the original Stacked Hourglass paper<sup>21</sup>.) For optimization we use the RMSProp optimizer<sup>20</sup> with  
276 momentum of 0, decay of 0.9. The network was trained using Tensorflow on an 8-core Intel Xeon CPU,  
277 with 24Gb RAM and a 12GB Titan XP GPU. All parameters used during training are published online in  
278 pose and detection model training config files, filename config\_train.yaml located in the MARS Developer  
279 repository at [github.com/neuroecology/MARS\\_Developer](https://github.com/neuroecology/MARS_Developer).

## 280 Pose evaluation

281 Each pose network was trained on 13,500 video frames from our pose annotation data set, and evaluated  
282 on the remaining 1,500 held-out frames, which were randomly sampled from the full data set. The same  
283 held-out frames were used for both detection and pose estimation steps.

284 We evaluated the accuracy of the MARS pose estimator by computing the "Percent Correct Keypoints"  
285 metric from CoCo<sup>9</sup>, defined as the fraction of predicted keypoints on test frames that fell within a radius  
286 X of "ground truth". Ground truth for this purpose was defined as the median of human annotations of  
287 keypoint location, computed along x and y axes separately.



288 To summarize these curves, we used the Object Keypoint Similarity (OKS) metric introduced by Ronchi  
289 and Perona<sup>22</sup>. Briefly, OKS is a measure of pose accuracy that normalizes errors by the estimated variance  
290 of human annotators. Specifically, given a keypoint with ground truth location  $X$  and estimated location  
291  $\hat{X}$ , the OKS for a given body part is defined as

$$292 \quad OKS = e^{-\frac{(\hat{X}-X)^2}{2\sigma^2k^2}}$$

293 Here,  $k^2$  is the size of the instance (the animal) in pixels, and  $\sigma^2$  is the variance of human annotators for  
294 that body part. Thus, an error of  $Z$  pixels is penalized more heavily for body parts where human variance  
295 is low (such as the nose), and more leniently for body parts where the ground truth itself is more unclear  
296 and human variance is higher (such as the sides of the body.) We computed  $\sigma$  for each body part from our  
297 15,000-frame dataset, in which each frame was annotated by five individuals. This yielded the following  
298 values of  $\sigma$ : for the top-view camera, 'nose tip': 0.039, 'right ear': 0.045, 'left ear': 0.045, 'neck': 0.042,  
299 'right side body': 0.067, 'left side body': 0.067, 'tail base': 0.044, 'middle tail': 0.067, 'end tail': 0.084. For  
300 the front-view camera, 'nose tip': 0.087, 'right ear': 0.087, 'left ear': 0.087, 'neck': 0.093, 'right side body':  
301 0.125, 'left side body': 0.125, 'tail base': 0.086, 'middle tail': 0.108, 'end tail': 0.145, 'right front paw': 0.125,  
302 'left front paw': 0.125, 'right rear paw': 0.125, 'left rear paw': 0.125. We also computed OKS values  
303 assuming a fixed  $\sigma = 0.025$  for all body parts, as reported in SLEAP<sup>23</sup>.

304 OKS values are typically summarized in terms of the Mean average precision (mAP) and Mean average  
305 recall (mAR)<sup>24</sup>, where Precision is True Positives / (True Positives + False Positives), and Recall is True  
306 Positives / (True Positives + False Negatives). For pose estimation, a True Positive occurs when a keypoint  
307 is detected falls within some "permissible radius"  $R$  of the ground truth.

308 To distinguish False Positives from False Negatives, we take advantage of the fact that MARS returns a  
309 confidence  $s$  for each keypoint, reflecting the model's certainty that a keypoint was indeed at the provided  
310 location. (MARS's pose model will return keypoint locations regardless of confidence, however low  
311 confidence is often a good indicator that those locations will be less accurate.) We will therefore call a  
312 keypoint a False Positive if confidence is above some threshold  $C$  but location is far from ground truth,  
313 and a False Negative otherwise. Because there is always a ground truth keypoint location (even when  
314 occluded), there is no True Negative category.

315 Given some permissible radius  $R$ , we can thus plot Precision-Recall curves as one would for a classifier, by  
316 plotting Precision vs. Recall as we vary the confidence threshold  $C$  from 0 to 1. We summarize this plot by  
317 taking the area under the P-R curve, a value called the Average Precision (AP). We also report the fraction  
318 of True Positive detections if any confidence score is accepted- called the Average Recall (AR).

319 The last value to set is our permissible radius  $R$ : how close does a predicted keypoint have to be to ground  
320 truth to be considered correct, and with what units? For units, we will use our previously defined OKS,  
321 which ranges from 0 (poor) to 1 (perfect). For choice of  $R$ , the accepted approach in machine learning<sup>9,24</sup>  
322 is to compute the AP and AR for each of  $R = [0.5, 0.55, 0.6, 0.65, 0.7, 0.75, 0.8, 0.85, 0.9, 0.95]$ , and then to  
323 take the mean value of AP and AR across these 10 values, thus giving the mean Average Precision (mAP)  
324 and mean Average Recall (mAR).

## 325 Pose features

326 Building on our previous work<sup>3</sup>, we designed a set of 270 spatiotemporal features extracted from the  
327 poses of interacting mice, to serve as input to supervised behavior classifiers. MARS's features can be  
328 broadly grouped into locomotion, position, appearance, social and image-based categories. Position  
329 features describe the position of an animal in relation to landmarks in the environment, such as the  
330 distance to the wall of the arena. Appearance-based features describe the pose of the animal in a single



331 frame, such as the orientation of the head and body or the area of an ellipse fit to the animal's pose.  
332 Locomotion features describe the movement of a single animal, such as speed or change of orientation of  
333 the animal. Image-based features describe the change of pixel intensity between movie frames. Finally,  
334 social features describe the position or motion of one animal relative to the other, such as inter-animal  
335 distance or difference of orientation between the animals. A full list of extracted features and their  
336 definitions can be found in **Table 1**. Most features are computed for both the resident and intruder mouse,  
337 however a subset of features are identical for the two animals and are computed only for the resident, as  
338 indicated in the Table.

339 Features are extracted for each frame of a movie, then each feature is smoothed by taking a moving  
340 average over three frames. Next, for each feature we compute the mean, standard deviation, minimum,  
341 and maximum value of that feature in windows of +/-33, +/-167, and +/-333 ms relative to the current  
342 frame, as in <sup>25</sup>; this addition allows MARS to capture how each feature is evolving over time. We thus  
343 obtain 12 additional "windowed" features for each original feature; we use 11 of these (omitting the mean  
344 of the given feature over +/-1 frame) plus the original feature as input to our behavior classifiers, giving a  
345 total of 3144 features. For classification of videos with different framerates from the training set, pose  
346 trajectories are resampled to match the framerate of the classifier training data.

347 In addition to their use for behavior classification, the pose features extracted by MARS can be loaded and  
348 visualized within Bento, allowing users to create custom annotations by applying thresholds to any  
349 combination of features. MARS features include many measurements that are commonly used in  
350 behavioral studies, such as animal velocity and distance to arena walls.

## 351 Behavior classifiers

352 From our full 14-hour video dataset, we randomly selected a training set of 6.95 hours of video annotated  
353 on a frame-by-frame basis by a single individual (Human #1 in Figure 5) for close investigation, mounting,  
354 and attack behavior. From these annotated videos, for each behavior we constructed a training set  $(\mathbf{X}, \mathbf{y})$   
355 where  $X_i$  corresponds to the 3144 windowed MARS pose features on frame  $i$ , and  $y_i$  is a binary label  
356 indicating the presence or absence of the behavior of interest on frame  $i$ . We evaluated performance of  
357 and performed parameter exploration using a held-out validation set of videos. A common form of error  
358 in many of our tested classifiers was to have sequences (1-3 frames) of false negative or false positives  
359 that were shorter than the typical behavior annotation bout. To correct these short error bouts, we  
360 introduced a post-processing stage following frame-wise classification, in which the classifier prediction  
361 is smoothed using a Hidden Markov Model followed by a three-frame moving average.

362 In preliminary exploration, we found that high precision and recall values for individual binary behavior  
363 classifiers were achieved by gradient boosting using the XGBoost algorithm<sup>26</sup>; we therefore used this  
364 algorithm for the three classifiers presented in this paper. Custom Python code to train novel behavior  
365 classifiers is included with the MARS\_Developer software. Classifier hyperparameters may be set by the  
366 user, otherwise MARS will provide default values.

367 Each trained classifier produces a predicted probability that the behavior occurred, as well as a binarized  
368 output created by thresholding that probability value. Following predictions by individual classifiers, MARS  
369 combines all classifier outputs to produce a single, multi-class label for each frame of a behavior video. To  
370 do so, we select on each frame the behavior label that has the highest predicted probability of occurring;  
371 if no behavior has a predicted probability of  $> 0.5$ , then the frame is labeled as "other" (no behavior  
372 occurring.) The advantage of this approach over training multi-class XGBoost is that it allows our ensemble  
373 of classifiers to be more easily expanded in the future to include additional behaviors of interest, because  
374 it does not require the original training set to be fully re-annotated for the new behavior.

## 375 Classifier evaluation

376 Accuracy of MARS behavior classifiers was estimated in terms of classifier Precision and Recall, where  
377 Precision = (number of true positive frames) / (number of true positive and false positive frames), and  
378 Recall = (number of true positive frames) / (number of true positive and false negative frames). Precision  
379 and Recall scores were estimated for the set of trained binary classifiers on a held-out test set of videos  
380 not seen during classifier training. Precision-Recall (PR) Curves were created for each behavior classifier  
381 by calculating classifier Precision and Recall values as the decision threshold (the threshold for classifying  
382 a frame as positive for a behavior) is varied from 0 to 1.

383

- 384 1 Blanchard, D. C., Griebel, G. & Blanchard, R. J. The Mouse Defense Test Battery: pharmacological  
385 and behavioral assays for anxiety and panic. *European Journal of Pharmacology* **463**, 97-116,  
386 doi:10.1016/s0014-2999(03)01276-7 (2003).
- 387 2 Zelikowsky, M. *et al.* The Neuropeptide Tac2 Controls a Distributed Brain State Induced by  
388 Chronic Social Isolation Stress. *Cell* **173**, 1265-1279 e1219, doi:10.1016/j.cell.2018.03.037  
389 (2018).
- 390 3 Hong, W. *et al.* Automated measurement of mouse social behaviors using depth sensing, video  
391 tracking, and machine learning. *Proceedings of the National Academy of Sciences* **112**, E5351-  
392 E5360 (2015).
- 393 4 Lee, H. *et al.* Scalable control of mounting and attack by Esr1+ neurons in the ventromedial  
394 hypothalamus. *Nature* **509**, 627-632, doi:10.1038/nature13169 (2014).
- 395 5 Hong, W., Kim, D. W. & Anderson, D. J. Antagonistic control of social versus repetitive self-  
396 grooming behaviors by separable amygdala neuronal subsets. *Cell* **158**, 1348-1361,  
397 doi:10.1016/j.cell.2014.07.049 (2014).
- 398 6 Kennedy, A. *et al.* Stimulus-specific hypothalamic encoding of a persistent, defensive state.  
399 *Nature* (in press).
- 400 7 Remedios, R. *et al.* Social behaviour shapes hypothalamic neural ensemble representations of  
401 conspecific sex. *Nature* **550**, 388-392, doi:10.1038/nature23885 (2017).
- 402 8 Katayama, Y. *et al.* CHD8 haploinsufficiency results in autistic-like phenotypes in mice. *Nature*  
403 **537**, 675-679 (2016).
- 404 9 Lin, T.-Y. *et al.* in *European conference on computer vision*. 740-755 (Springer).
- 405 10 Andriluka, M., Pishchulin, L., Gehler, P. & Schiele, B. in *Proceedings of the IEEE Conference on*  
406 *computer Vision and Pattern Recognition*. 3686-3693.
- 407 11 Wah, C., Branson, S., Welinder, P., Perona, P. & Belongie, S. The caltech-ucsd birds-200-2011  
408 dataset. (2011).
- 409 12 Mathis, A. *et al.* DeepLabCut: markerless pose estimation of user-defined body parts with deep  
410 learning. *Nat Neurosci* **21**, 1281-1289, doi:10.1038/s41593-018-0209-y (2018).
- 411 13 Pereira, T. D. *et al.* Fast animal pose estimation using deep neural networks. *bioRxiv*,  
412 doi:10.1101/331181 (2018).
- 413 14 Graving, J. M. *et al.* DeepPoseKit, a software toolkit for fast and robust animal pose estimation  
414 using deep learning. *Elife* **8**, doi:10.7554/eLife.47994 (2019).
- 415 15 Vardi, Y. & Zhang, C.-H. The multivariate L1-median and associated data depth. *Proceedings of*  
416 *the National Academy of Sciences* **97**, 1423-1426 (2000).
- 417 16 Dollár, P. (2014).
- 418 17 Erhan, D., Szegedy, C., Toshev, A. & Anguelov, D. in *Proceedings of the IEEE conference on*  
419 *computer vision and pattern recognition*. 2147-2154.

- 420 18 Szegedy, C., Reed, S., Erhan, D., Anguelov, D. & Ioffe, S. Scalable, high-quality object detection.  
421 *arXiv preprint arXiv:1412.1441* (2014).
- 422 19 Szegedy, C., Ioffe, S., Vanhoucke, V. & Alemi, A. A. in *Thirty-first AAAI conference on artificial*  
423 *intelligence*.
- 424 20 Hinton, G., Srivastava, N. & Swersky, K. Neural networks for machine learning lecture 6a  
425 overview of mini-batch gradient descent.
- 426 21 Newell, A., Yang, K. & Deng, J. in *European Conference on Computer Vision*. 483-499 (Springer).
- 427 22 Ruggero Ronchi, M. & Perona, P. in *Proceedings of the IEEE international conference on*  
428 *computer vision*. 369-378.
- 429 23 Pereira, T. D. *et al.* SLEAP: multi-animal pose tracking. *bioRxiv* (2020).
- 430 24 Pishchulin, L. *et al.* in *Proceedings of the IEEE conference on computer vision and pattern*  
431 *recognition*. 4929-4937.
- 432 25 Kabra, M., Robie, A. A., Rivera-Alba, M., Branson, S. & Branson, K. JAABA: interactive machine  
433 learning for automatic annotation of animal behavior. *Nature methods* **10**, 64 (2013).
- 434 26 Chen, T. & Guestrin, C. in *Proceedings of the 22nd acm sigkdd international conference on*  
435 *knowledge discovery and data mining*. 785-794.
- 436

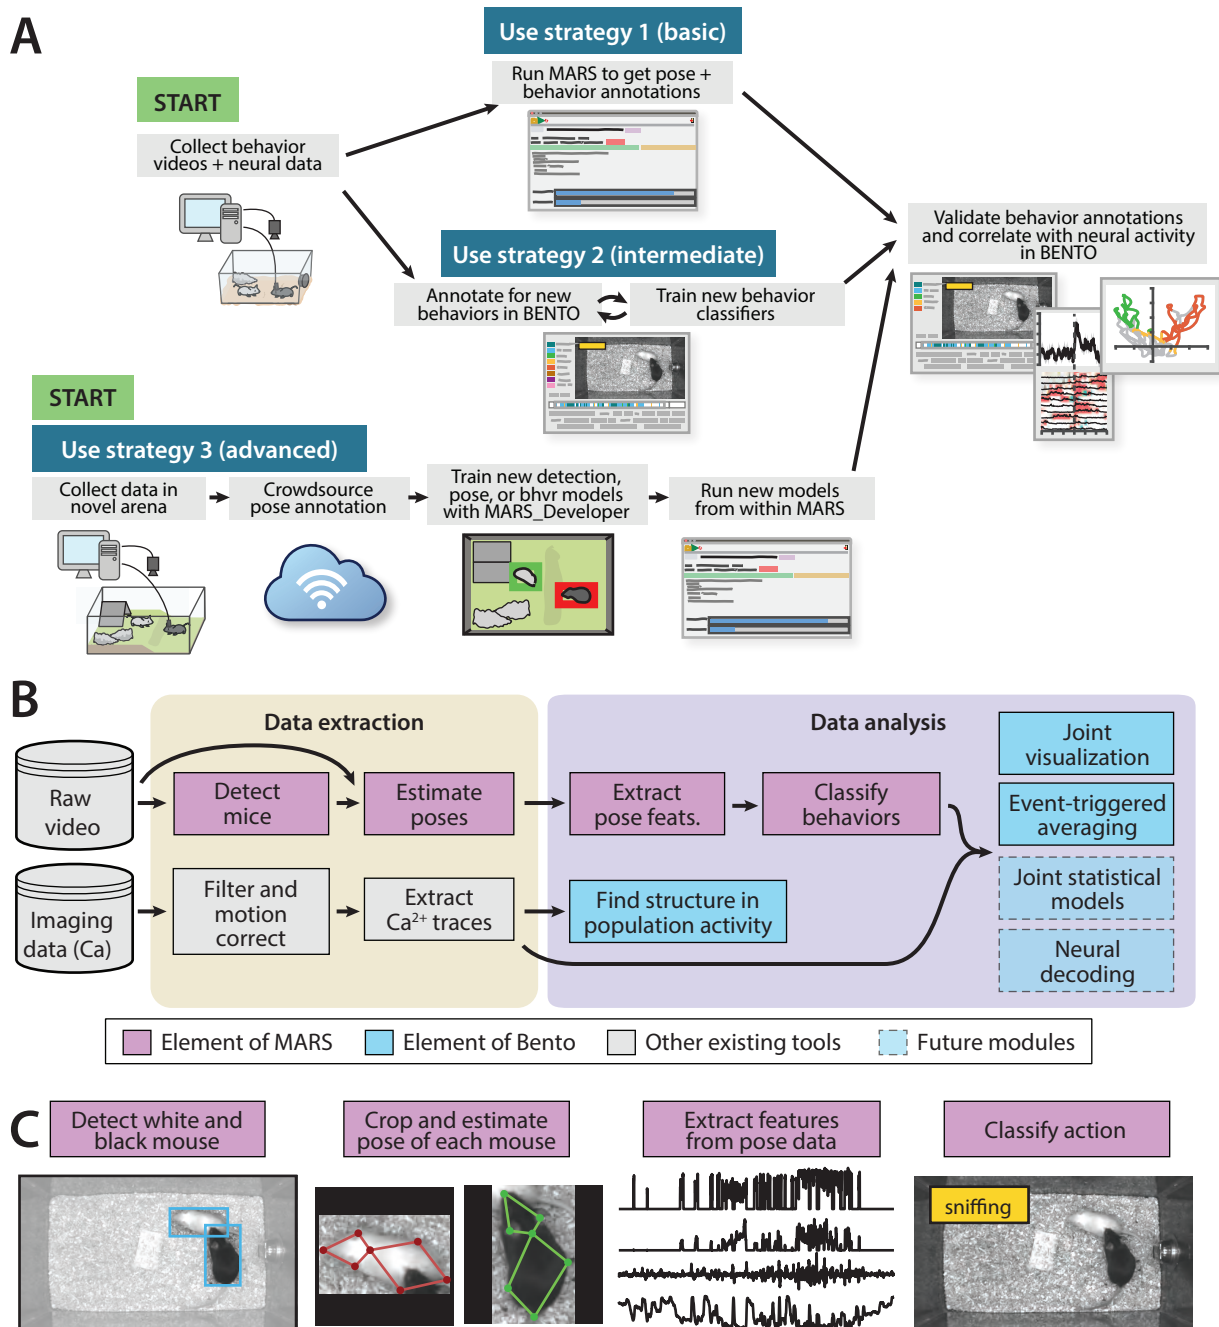

**Figure 1.** The MARS data pipeline. **A)** Sample use strategies of MARS, including either out-of-the-box application or fine-tuning to custom arenas or behaviors of interest. **B)** Overview of data extraction and analysis steps in a typical neuroscience experiment, indicating contributions to this process by MARS and Bento. **B)** Illustration of the four stages of data processing included in MARS. **C)** Sample output of the four stages of the MARS pipeline.

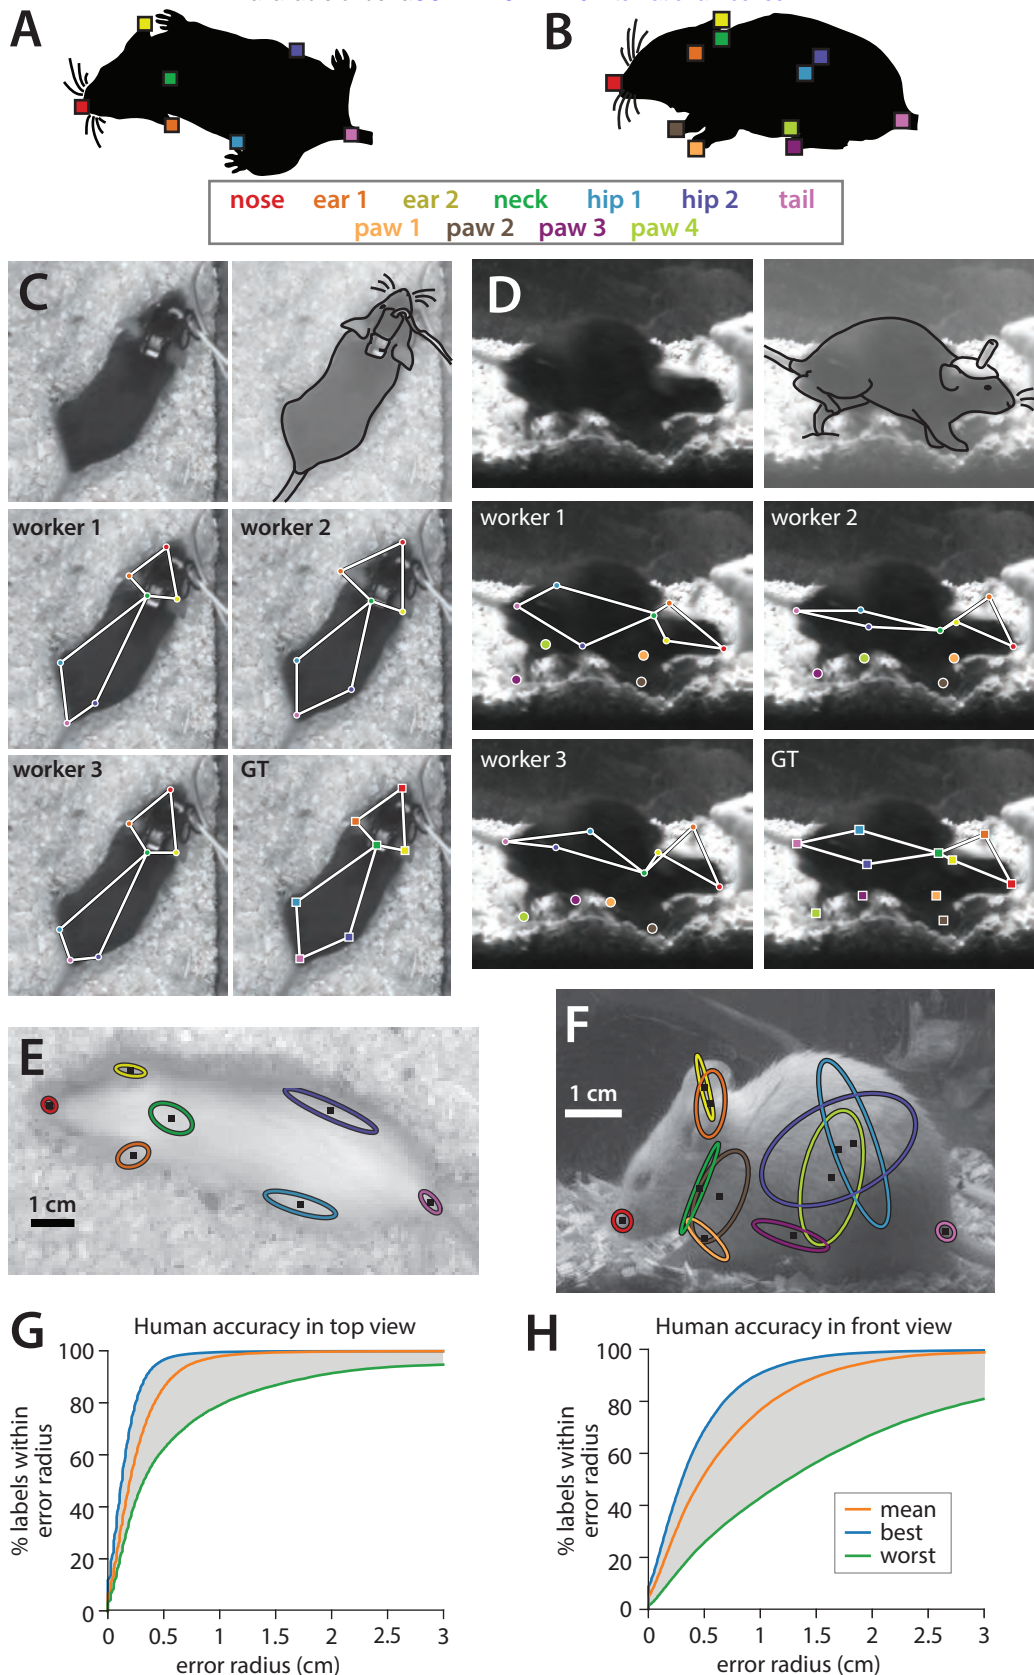

**Figure 2.** Quantifying human annotation variability in top- and front-view pose estimates. **A-B**) Anatomical keypoints labeled by human annotators in **A**) top-view and **B**) front-view movie frames. **C-D**) Comparison of annotator labels in **C**) top-view and **D**) front-view frames. Top row: left crop of original image shown to annotators (annotators were always provided with the full video frame), right approximate figure of the mouse (traced for clarity). Middle-bottom rows: Keypoint locations provided by three example annotators, and the extracted “ground truth” from the median of all annotations. **E-F**) Ellipses showing variability of human annotations of each keypoint in one example frame from **E**) top view and **F**) front view ( $N=5$  annotators, one standard deviation ellipse radius.) **G-H**) Variability in human annotations of mouse pose for the top-view video, plotted as the percentage of human annotations falling within radius  $X$  of ground truth, for **G**) top-view and **H**) front-view frames.



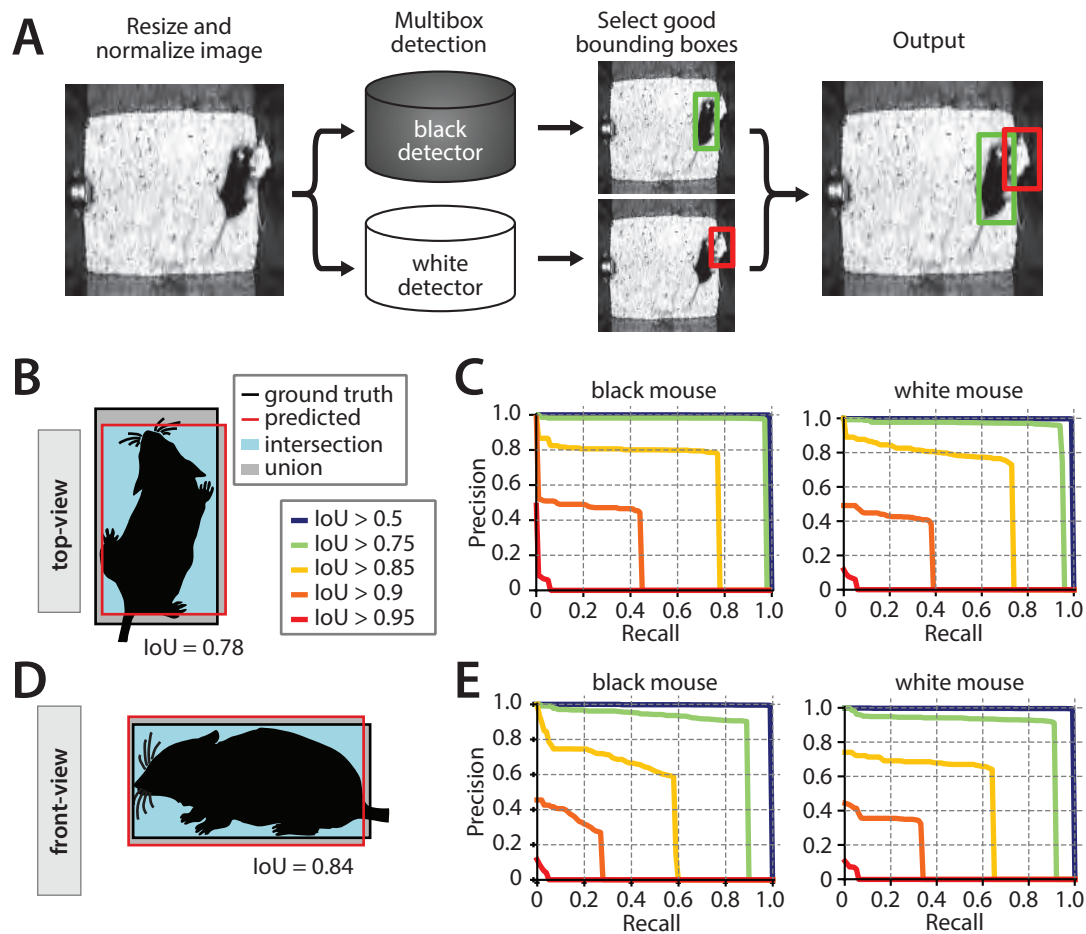

**Figure 3.** Performance of the mouse detection network. **A)** Processing stages of mouse detection pipeline. **B)** Illustration of Intersection over Union (IoU) metric for the top-view video. **C)** PR curves for multiple IoU thresholds for detection of the two mice in the top-view video. **D)** Illustration of IoU for the front-view video. **E)** PR curves for multiple IoU thresholds in the front-view video.



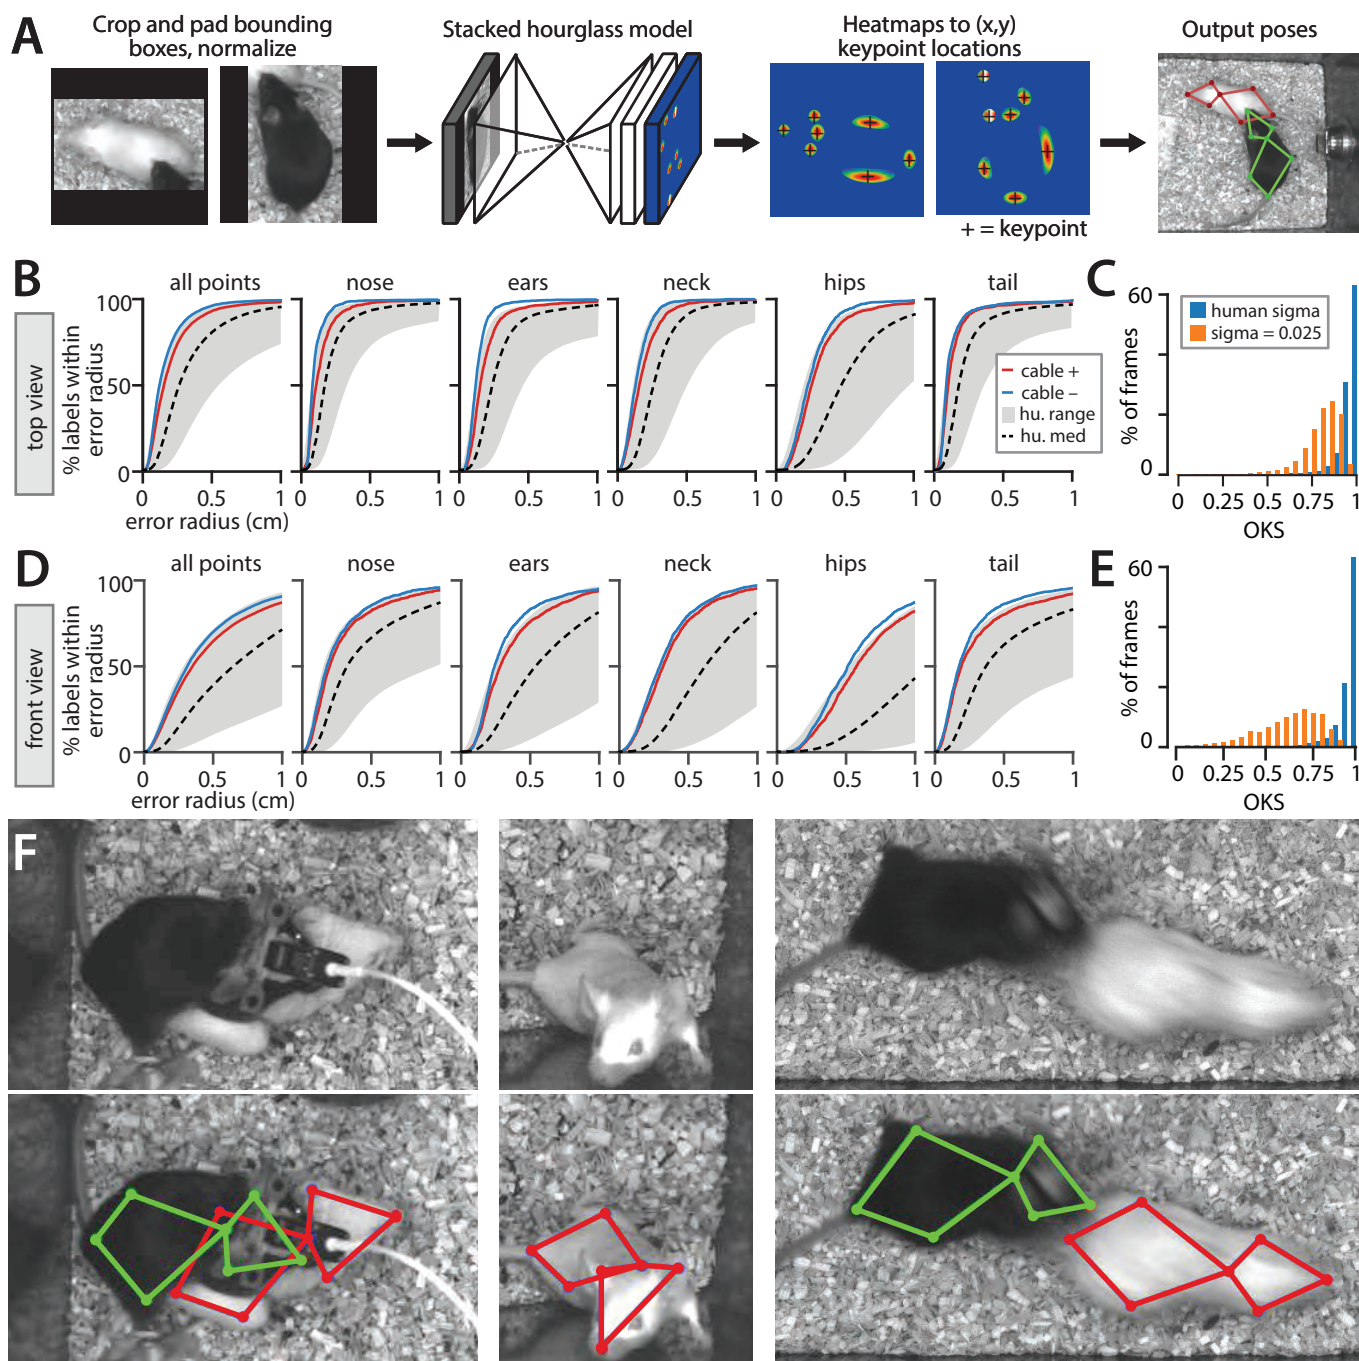

**Figure 4.** Performance of the stacked hourglass network for pose estimation. **A)** Processing stages of pose estimation pipeline. **B)** MARS accuracy for individual body parts, showing performance for videos with vs without a head-mounted microendoscope or fiber photometry cable on the black mouse. Gray envelop shows the accuracy of the best vs worst human annotations; dashed black line is median human accuracy. **C)** Histogram of Object-keypoint similarity (OKS) scores across frames in the test set. Blue bars: normalized by human annotation variability; orange bars, normalized using a fixed variability of 0.025 (see Methods.) **D)** MARS accuracy for individual body parts in front-view videos with vs without microendoscope or fiber photometry cables. **E)** Histogram of OKS scores for the front-view camera. **F)** Sample video frames (above) and MARS pose estimates (below) in cases of occlusion and motion blur.

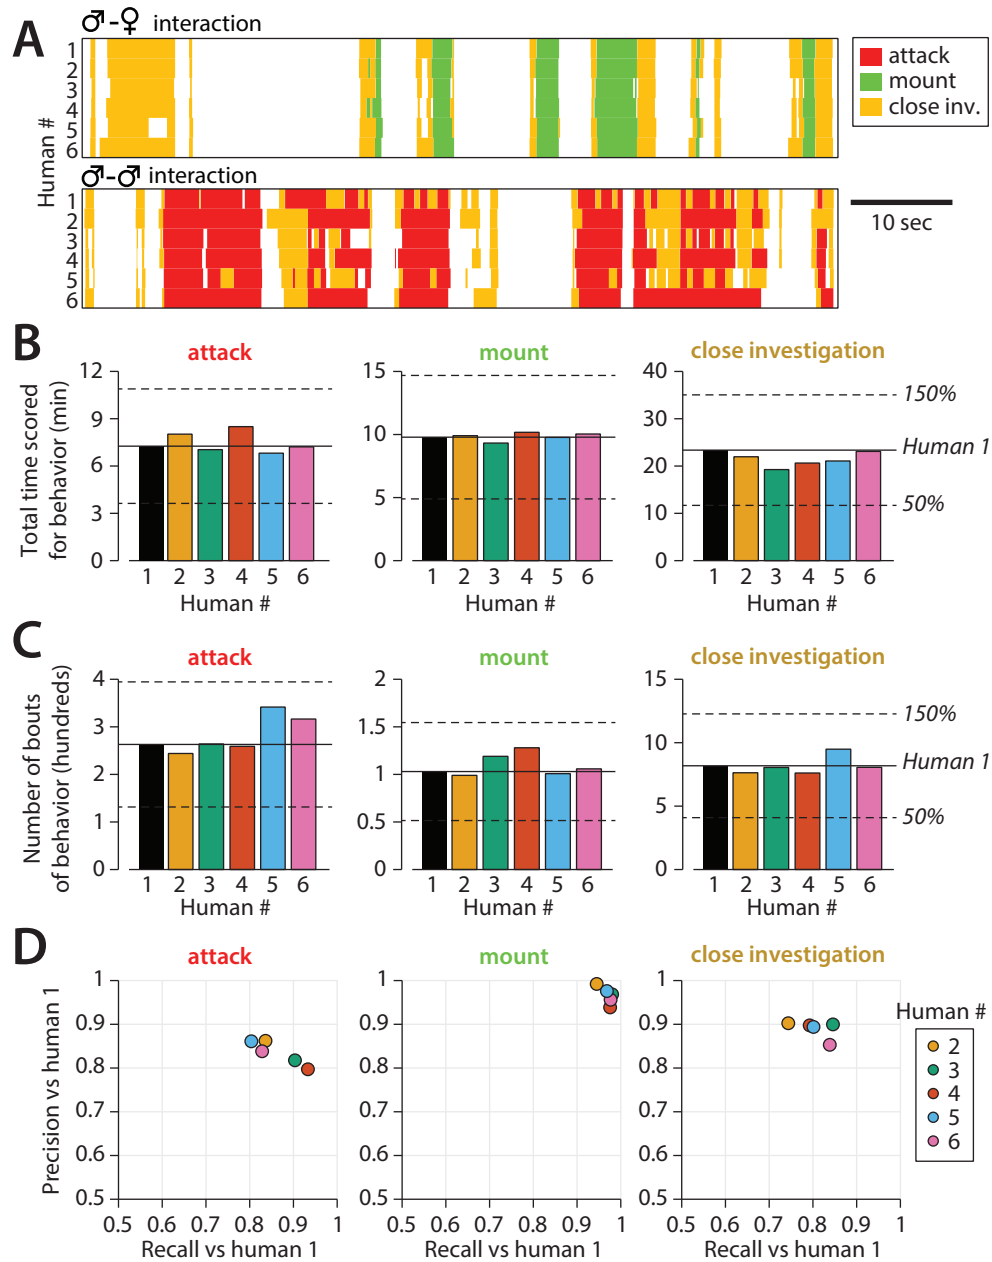

**Figure 5.** Quantifying inter-annotator variability in behavior annotations. **A)** Example annotation for attack, mounting, and close investigation behaviors by six trained annotators on segments of male-female (top) and male-male (bottom) interactions. **B)** Inter-annotator variability in the total reported time mice spent engaging in each behavior. **C)** Inter-annotator variability in the number of reported bouts (contiguous sequences of frames) scored for each behavior. **D)** Precision and recall of annotators (humans) 2-6 with respect to annotations by human 1.

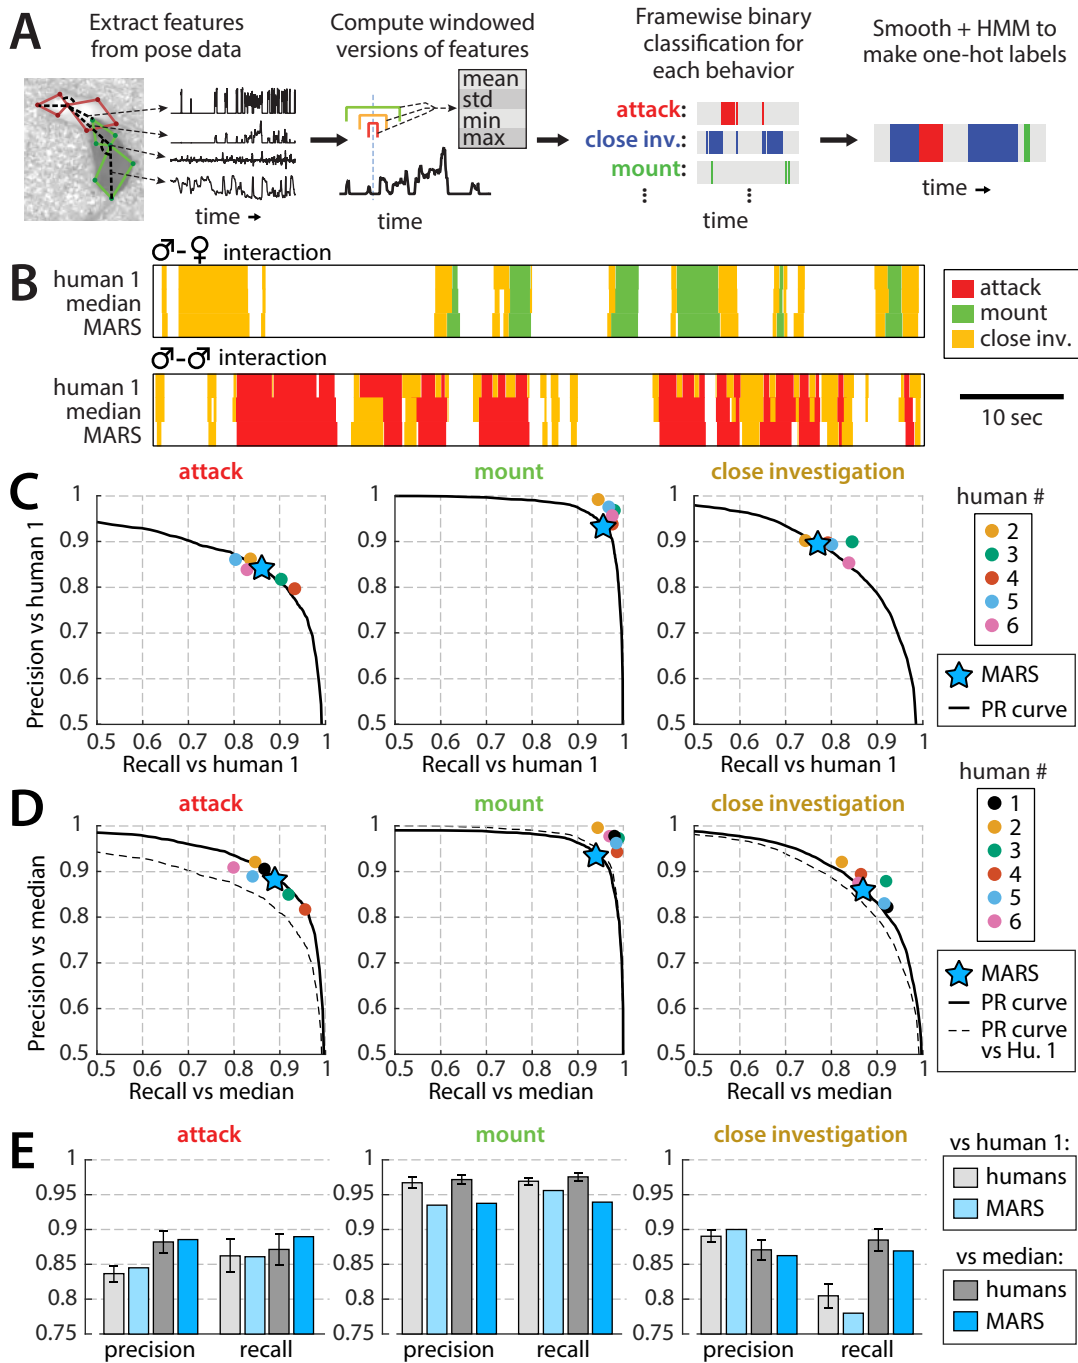

**Figure 6.** Performance of behavior classifiers. **A)** Processing stages of estimating behavior from pose of both mice. **B)** Example output of the MARS behavior classifiers on segments of male-female and male-male interactions, compared to annotations by human 1 (source of classifier training data) and to the median of the six human annotators analyzed in Figure 5. **C)** Precision, recall, and PR curves of MARS with respect to human 1 for each of the three behaviors. **D)** Precision, recall, and PR curves of MARS with respect to the median of the six human annotators (precision/recall for each human annotator was computed with respect to the median of the other five.) **E)** Mean precision and recall of human annotators vs MARS, relative to human 1 and relative to the group median (mean ± SEM).

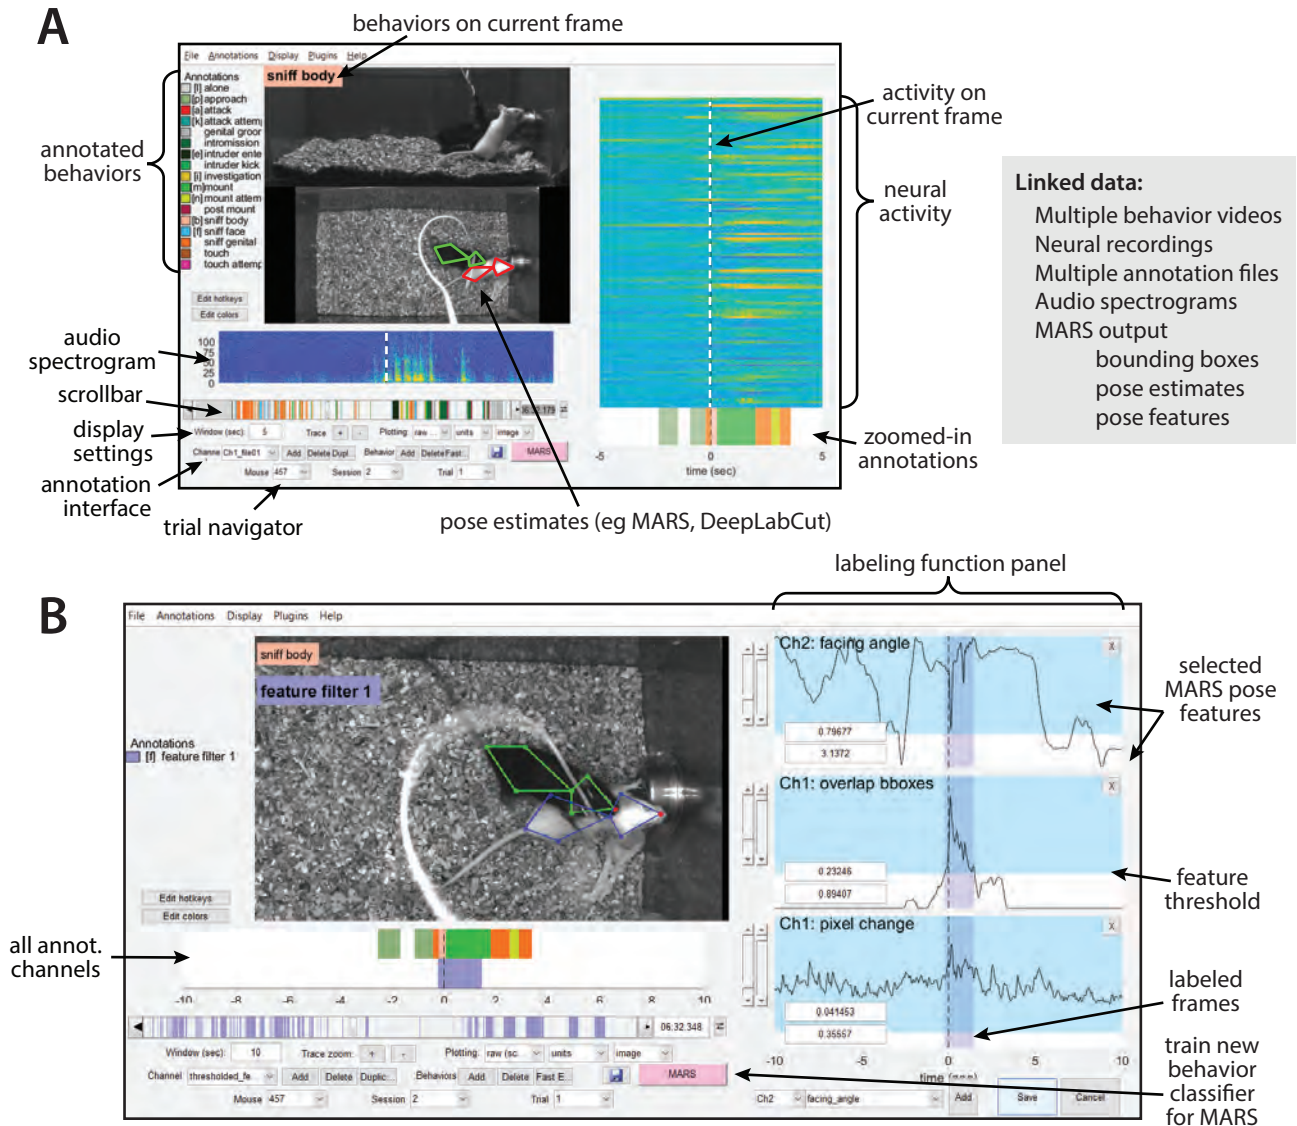

**Figure 7.** Screenshot of the Bento user interface. **A**) (Left) the main user interface showing synchronous display of video, pose estimation, neural activity, and pose feature data. (right) list of data types that can be loaded and synchronously displayed within Bento. **B**) Bento interface for creating annotations based on thresholded combinations of MARS pose features.



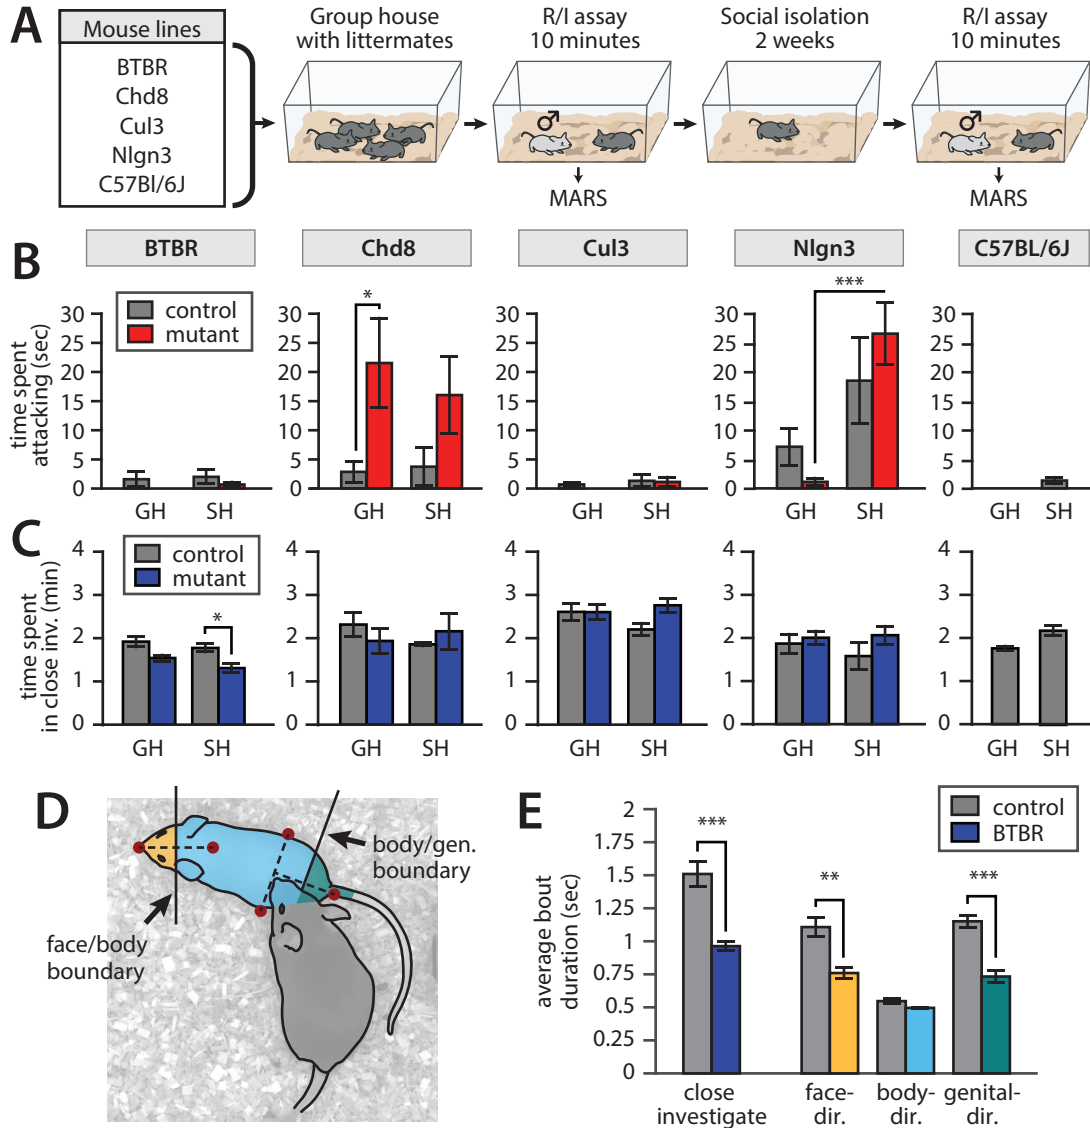

**Figure 8.** Application of MARS in a large-scale behavioral assay. All plots: mean  $\pm$  SEM,  $N=8-10$  mice per genotype per line (83 mice total); \* =  $p<0.05$ , \*\* =  $p<0.01$ , \*\*\* =  $p<0.001$ ; full statistical reporting in Table 2. **A**) Assay design. **B**) Time spent attacking by group-housed (GH) and single-housed (SH) mice from each line, compared to controls. (Chd8 GH het vs ctrl  $p=0.0371$ , t-test; Nlgn3 het GH vs SH  $p=0.007$ , paired t-test.) **C**) Time spent engaged in close investigation by each condition/line. (BTBR SH mutant vs ctrl  $p=0.0186$ , t-test.) **D**) Cartoon showing segmentation of close investigation bouts into face-, body-, and genital-directed investigation. Frames are classified based on the position of the resident's nose relative to a boundary midway between the intruder mouse's nose and neck, and a boundary midway between the intruder mouse's hips and tail base. **E**) Average duration of close investigation bouts in BTBR mice, for investigation as a whole and broken down by the body part investigated (close investigation,  $p=0.0002$ , face-directed  $p=0.0012$ , genital-directed  $p=0.0001$ , t-test).

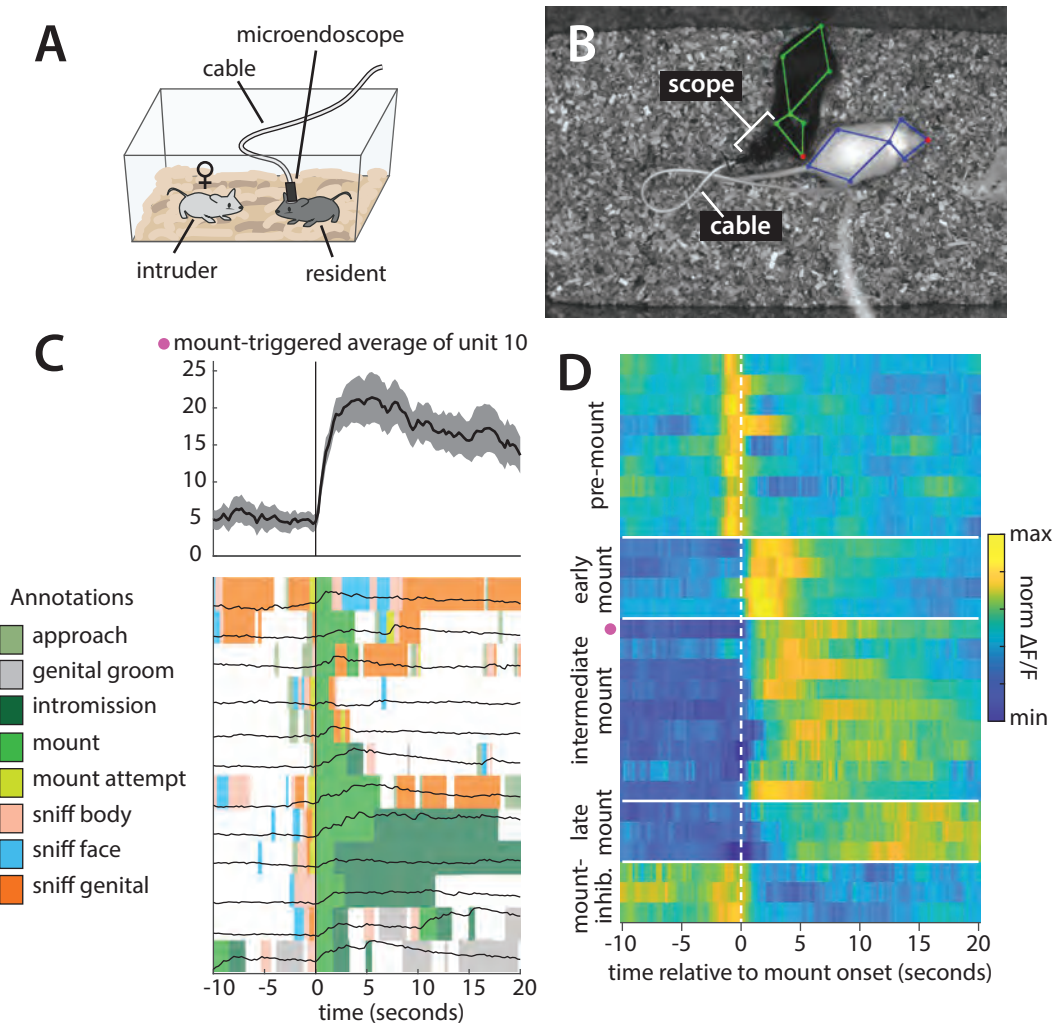

**Figure 9.** Analysis of a microendoscopic imaging dataset using MARS and Bento. **A)** Schematic of the imaging setup, showing head-mounted microendoscope. **B)** Sample video frame with MARS pose estimate, showing appearance of the microendoscope and cable during recording. **C)** Sample behavior-triggered average figure produced by Bento. (Top) mount-triggered average response of one example neuron within a 30-second window (mean  $\pm$  SEM). (Bottom) individual trials contributing to mount-triggered average, showing animal behavior (colored patches) and neuron response (black lines) on each trial. The behavior-triggered average interface allows the user to specify the window considered during averaging (here 10 seconds before to 20 seconds after mount initiation), whether to merge behavior bouts occurring less than X seconds apart, whether to trigger on behavior start or end, and whether to normalize individual trials before averaging; results can be saved as a pdf or exported to the Matlab workspace. **D)** Normalized mount-triggered average responses of 28 example neurons in the medial preoptic area (MPOA), identified using Bento. Grouping of neurons reveals diverse subpopulations of cells responding at different times relative to the onset of mounting. (Pink dot = neuron shown in panel C.)



| Position Features                                        |                   |                                                                                                                                                                                                       |     |       |
|----------------------------------------------------------|-------------------|-------------------------------------------------------------------------------------------------------------------------------------------------------------------------------------------------------|-----|-------|
| name                                                     | units             | definition                                                                                                                                                                                            | res | intr. |
| (p)_x, (p)_y                                             | cm                | x,y coordinates of each body part, for p in (nose, left ear, right ear, neck, left hip, right hip, tail)                                                                                              | x   | x     |
| centroid_x, centroid_y                                   | cm                | x,y coordinates of the centroid of an ellipse fit to the seven keypoints representing the mouse's pose.                                                                                               | x   | x     |
| centroid_head_x, centroid_head_y                         | cm                | x,y coordinates of the centroid of an ellipse fit to the nose, left and right ear, and neck keypoints.                                                                                                | x   | x     |
| centroid_hips_x, centroid_hips_y                         | cm                | x,y coordinates of the centroid of an ellipse fit to the left and right hip and tail base keypoints.                                                                                                  | x   | x     |
| centroid_body_x, centroid_body_y                         | cm                | x,y coordinates of the centroid of an ellipse fit to the neck, left and right hip, and tail base keypoints.                                                                                           | x   | x     |
| dist_edge_x, dist_edge_y                                 | cm                | distance from the centroid of the mouse to the closest vertical (dist_edge_x) or horizontal (dist_edge_y) wall of the home cage.                                                                      | x   | x     |
| dist_edge                                                | cm                | distance from the centroid of the mouse to the closest of the four walls of the home cage.                                                                                                            | x   | x     |
| Appearance Features                                      |                   |                                                                                                                                                                                                       |     |       |
| name                                                     | units             | definition                                                                                                                                                                                            | res | intr. |
| phi                                                      | radians           | absolute orientation of the mouse, measured by the orientation of a vector from the centroid of the head to the centroid of the hips.                                                                 | x   | x     |
| ori_head                                                 | radians           | absolute orientation of a vector from the neck to the tip of the nose.                                                                                                                                | x   | x     |
| ori_body                                                 | radians           | absolute orientation of a vector from the tail to the tip of the neck.                                                                                                                                | x   | x     |
| angle_head_body_l, angle_head_body_r                     | radians           | angle formed by the left(right) ear, neck and left(right) hip keypoints.                                                                                                                              | x   | x     |
| major_axis_len, minor_axis_len                           | cm                | major and minor axis of an ellipse fit to the seven keypoints representing the mouse's pose.                                                                                                          | x   | x     |
| axis_ratio                                               | none              | major_axis_len/minor_axis_len (as defined above).                                                                                                                                                     | x   | x     |
| area_ellipse                                             | cm <sup>2</sup>   | area of the ellipse fit to the mouse's pose.                                                                                                                                                          | x   | x     |
| dist_(p1)(p2)                                            | cm                | distance between all pairs of keypoints (p1, p2) of the mouse's pose.                                                                                                                                 | x   | x     |
| Locomotion Features                                      |                   |                                                                                                                                                                                                       |     |       |
| name                                                     | units             | definition                                                                                                                                                                                            | res | intr. |
| speed                                                    | cm/s              | mean change in position of centroids of the head and hips (see Position Features), computed across two consecutive frames.                                                                            | x   | x     |
| speed_centroid                                           | cm/s              | change in position of the mouse's centroid (see Position Features), computed across two consecutive frames.                                                                                           | x   | x     |
| acceleration                                             | cm/s <sup>2</sup> | mean change in speed of centroids of the head and hips, computed across two consecutive frames.                                                                                                       | x   | x     |
| acceleration_centroid                                    | cm/s <sup>2</sup> | change in speed of the mouse's centroid, computed across two consecutive frames.                                                                                                                      | x   | x     |
| speed_fwd                                                | cm/s              | speed of the mouse in the direction of ori_body (see Appearance Features).                                                                                                                            | x   | x     |
| radial_vel                                               | cm/s              | component of the mouse's centroid velocity along the vector between the centroids of the two mice, computed across two consecutive frames.                                                            | x   | x     |
| tangential_vel                                           | cm/s              | component of the mouse's centroid velocity tangential to the vector between the centroids of the two mice, computed across two consecutive frames.                                                    | x   | x     |
| speed_centroid_w2, speed_centroid_w5, speed_centroid_w10 | cm/s              | speed of the mouse's centroid, computed as the change in position between frames either 2, 5, or 10 frames apart.                                                                                     | x   | x     |
| speed_(p)_w2, speed_(p)_w5, speed_(p)_w10                | cm/s              | speed of each keypoint (p) of the mouse's pose, computed as the change in position between timepoints 2, 5, or 10 frames apart.                                                                       | x   | x     |
| Image-based features                                     |                   |                                                                                                                                                                                                       |     |       |
| name                                                     | units             | definition                                                                                                                                                                                            | res | intr. |
| pixel_change                                             | none              | mean squared value of (pixel intensity on current frame minus mean pixel intensity on previous frame) over all pixels, divided by mean pixel intensity on current frame (as defined in [Hong et al.]) | x   |       |
| pixel_change_ubbox_mice                                  | none              | pixel change (as above) computed only on pixels within the union of the bounding boxes of the detected mice (when bounding box overlap is greater than 0; 0 otherwise).                               | x   |       |
| (p)_pc                                                   | none              | pixel change (as above) within a 20 pixel-diameter square around the keypoint for each body part (p).                                                                                                 | x   | x     |
| Social features                                          |                   |                                                                                                                                                                                                       |     |       |
| name                                                     | units             | definition                                                                                                                                                                                            | res | intr. |
| resident_head_toward_intruder_head/body (resh_twd_itrhb) | none              | binary variable that is 1 if the centroid of the other mouse is within a -45° to 45° cone in front of the animal.                                                                                     | x   | x     |
| rel_angle_social                                         | radians           | relative angle between the body of the mouse (ori_body) and the line connecting the centroids of both mice.                                                                                           | x   | x     |
| rel_dist_centroid                                        | cm                | distance between the centroids of the two mice.                                                                                                                                                       | x   |       |
| rel_dist_centroid_change                                 | cm                | change in distance between the centroids of the two mice, computed across two consecutive frames.                                                                                                     | x   |       |
| rel_dist_gap                                             | cm                | distance between ellipses fit to the two mice along the vector between the two ellipse centers, equivalent to Feature 13 of [Hong et al.].                                                            | x   |       |
| rel_dist_scaled                                          | cm                | distance between the two animals along the line connecting the two centroids, divided by length of the major axis of one mouse, equivalent to Feature 14 of [Hong et al.].                            | x   | x     |
| rel_dist_head                                            | cm                | distance between centroids of ellipses fit to the heads of the two mice.                                                                                                                              | x   |       |
| rel_dist_body                                            | cm                | distance between centroids of ellipses fit to the bodies of the two mice.                                                                                                                             | x   |       |
| rel_dist_head_body                                       | cm                | distance from the centroid of an ellipse fit to the head of mouse A to the centroid of an ellipse fit to the body of mouse B.                                                                         | x   | x     |
| overlap_bboxes                                           | none              | intersection over union of the bounding boxes of the two mice.                                                                                                                                        | x   |       |
| area_ellipse_ratio                                       | none              | ratio of the areas of ellipses fit to the poses of the two mice.                                                                                                                                      | x   | x     |
| angle_between                                            | radians           | angle between mice defined as the angle between the projection of the centroids.                                                                                                                      | x   |       |
| facing_angle                                             | radians           | angle between head orientation of one mouse and the line connecting the centroids of both animals.                                                                                                    | x   | x     |
| dist_m1(p1)_m2(p2)                                       | cm                | distance between keypoints of one mouse w.r.t to the other, for all pairs of keypoints (p1, p2).                                                                                                      | x   |       |

**Table 2: Statistical significance testing**

All t-tests are two-sided unless otherwise stated. All tests from distinct samples unless otherwise stated.

Effect size for two-sample t-test is Cohen's d.

Effect size for rank sum test is  $U/(n1*n2)$  where n1 and n2 are sample sizes of the two categories.

| Figure | Panel | Identifier                   | Sample size            | Statistical test  | Test stat. | CI             | Effect size | DF | p-value   |
|--------|-------|------------------------------|------------------------|-------------------|------------|----------------|-------------|----|-----------|
| 8      | b     | Chd8 GH mutant vs GH control | 8 het 8 wt             | two-sample t-test | 2.31       | 0.216 to 5.85  | 1.155       | 14 | 0.0367    |
|        |       | Nlgn3 GH mutant vs SH mutant | 10 GH 8 SH             | two-sample t-test | 4.40       | 2.79 to 7.99   | 1.958       | 16 | 0.000449  |
|        | c     | BTBR SH mutant vs SH control | 10 het 10 wt           | two-sample t-test | 2.59       | 0.923 to 8.91  | 1.157       | 18 | 0.0186    |
|        | e     | close investigate            | 10 het 10 wt           | two-sample t-test | 4.58       | 0.276 to 0.743 | 2.05        | 18 | 0.000230  |
|        |       | face-directed                | 10 het 10 wt           | two-sample t-test | 3.84       | 0.171 to 0.582 | 1.72        | 18 | 0.00120   |
|        |       | genital-directed             | 10 het 10 wt           | two-sample t-test | 5.01       | 0.233 to 0.568 | 2.24        | 18 | 0.0000903 |
| ED 8   | b     | attack                       | 6 vs. self 15 vs other | Wilcoxon rank sum | U = 79     | x              | 0.878       | x  | 0.00623   |
|        |       | close investigation          | 6 vs. self 15 vs other | Wilcoxon rank sum | U = 73     | x              | 0.811       | x  | 0.0292    |
|        | d     | attack                       | 8 vs. self 28 vs other | Wilcoxon rank sum | U = 204    | x              | 0.911       | x  | 0.000498  |
|        |       | close investigation          | 8 vs. self 28 vs other | Wilcoxon rank sum | U = 193    | x              | 0.862       | x  | 0.00219   |

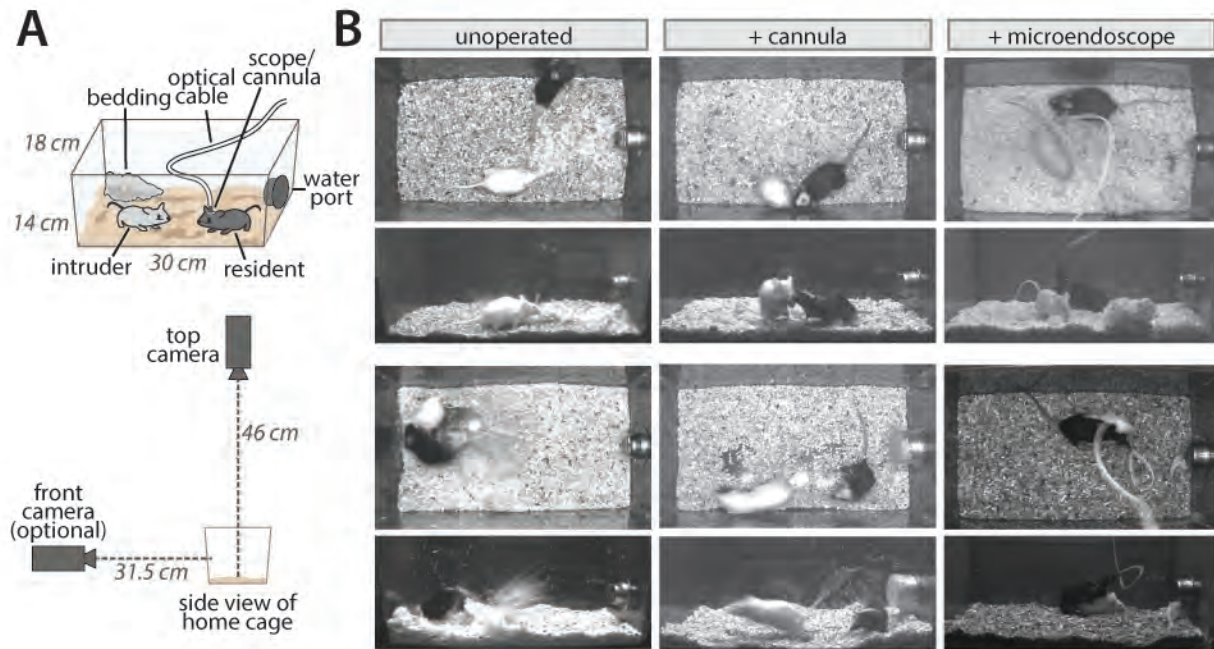

**ED Figure 1. MARS camera positioning and sample frames.** A) Contents of the home cage and positioning of cameras for data collection. B) Sample top- and front-view frames from mice with and without head-attached cables, including representative examples of occlusion and motion blur in the dataset (bottom row of images.)

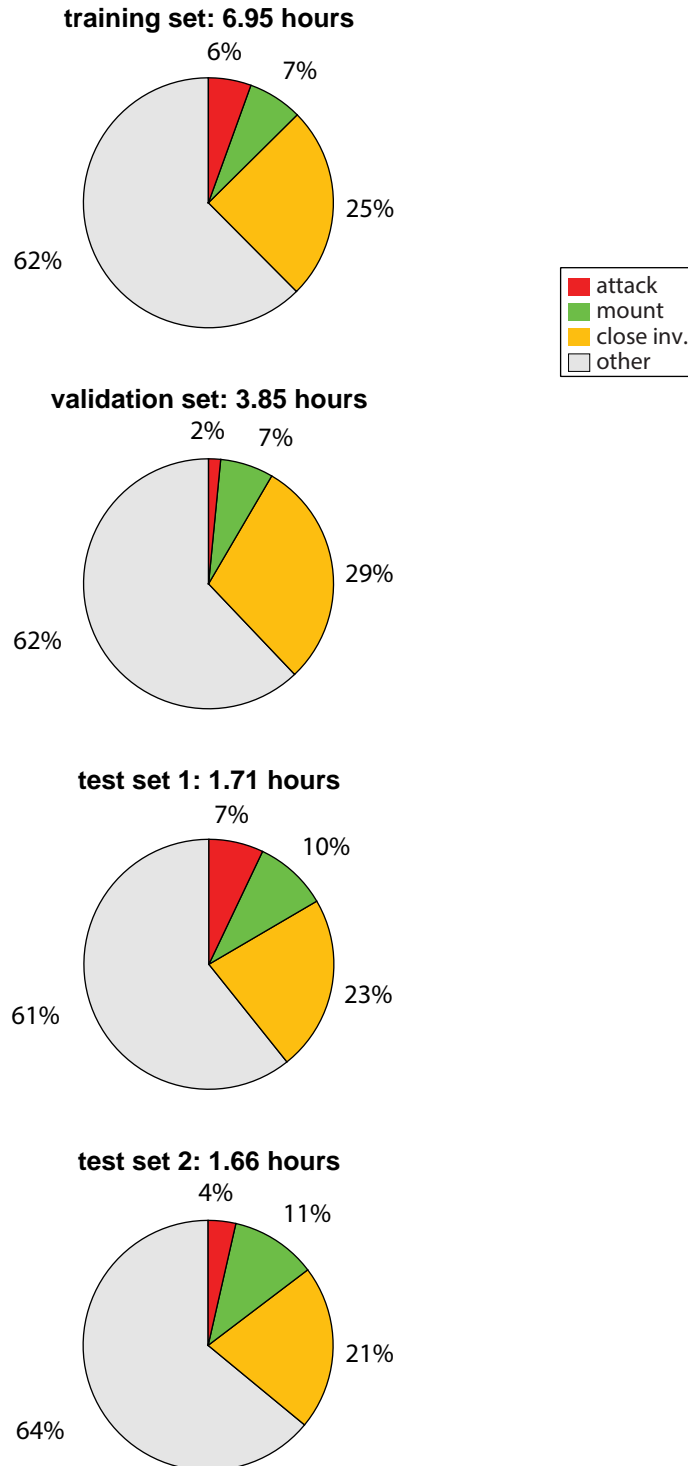

**ED Figure 2.** The MARS annotation dataset. Number of hours scored for each behavior in the 13.2-hour MARS dataset, broken down by training, validation, and test sets.

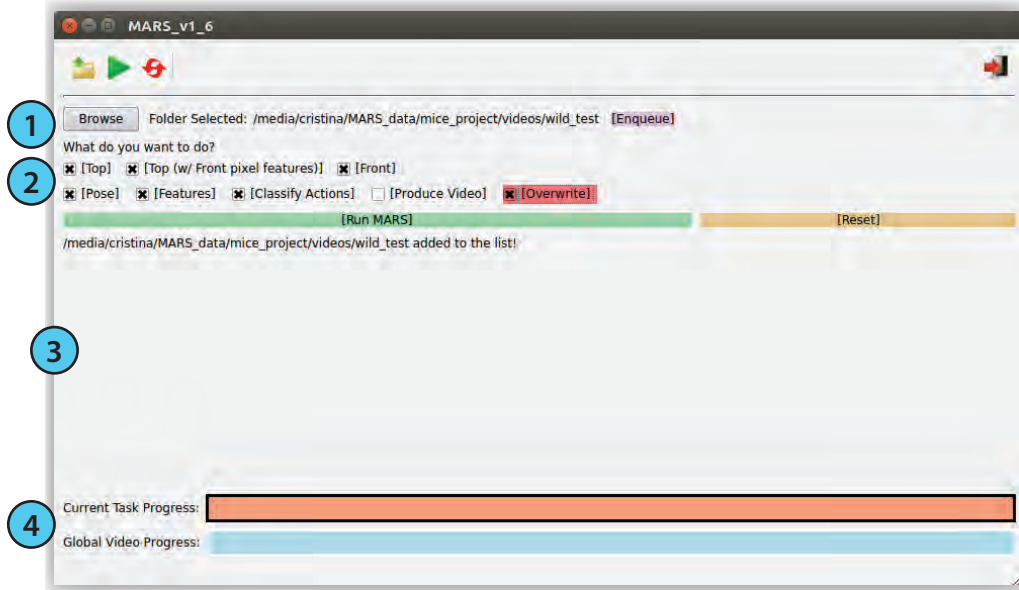

**ED Figure 3. MARS graphical user interface.**

1. File navigator, supporting queueing of multiple jobs while tracking is running.
2. User options: specify video source (top/front view camera), type of features to extract, and analyses to perform (pose estimation, feature extraction, behavior classification, video output.)
3. Display of status updates during analysis.
4. Progress bars for current video and for all jobs in the queue.

### Top view

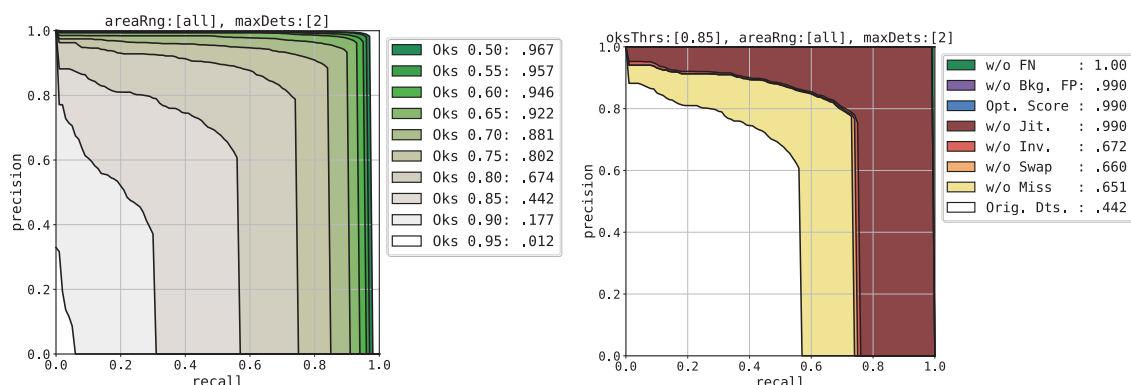

### Front view

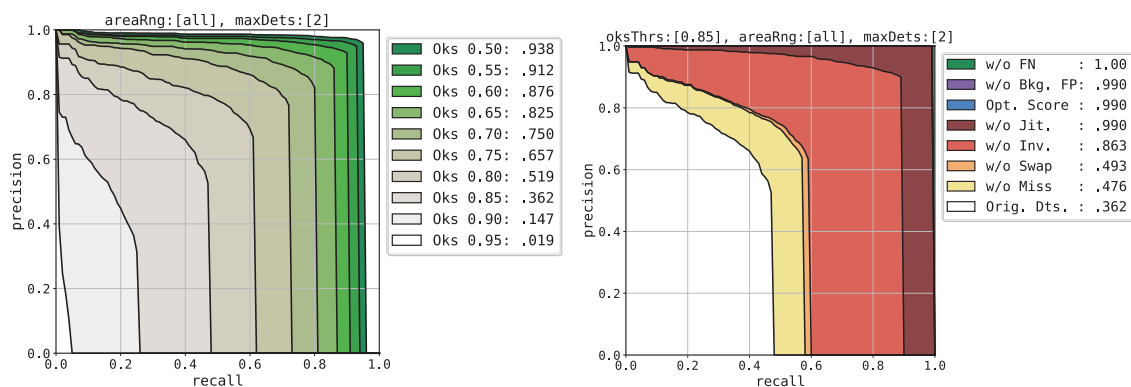

**ED Figure 4.** Breakdown of MARS keypoint errors for top- and front-view pose models. Left: Precision/Recall curves as a function of Object Keypoint Similarity (OKS) cutoff; area under curve indicated in legend. Right: Breakdown of error sources and their effect on Precision/Recall curve at an OKS cutoff of 0.85. Error types are as defined in Ronchi and Perona 2017. Classes of keypoint position errors: **Miss**: large localization error; **Swap**: confusion between similar parts of different instances (animals); **Inversion**: confusion between semantically similar parts of the same instance (eg left/right ears); **Jitter**: small localization errors; **Opt Score**: mis-ranking of predictions by confidence (not relevant); **Bkg FP**: performance after removing background false positives; **FN**: performance after removing false negatives.



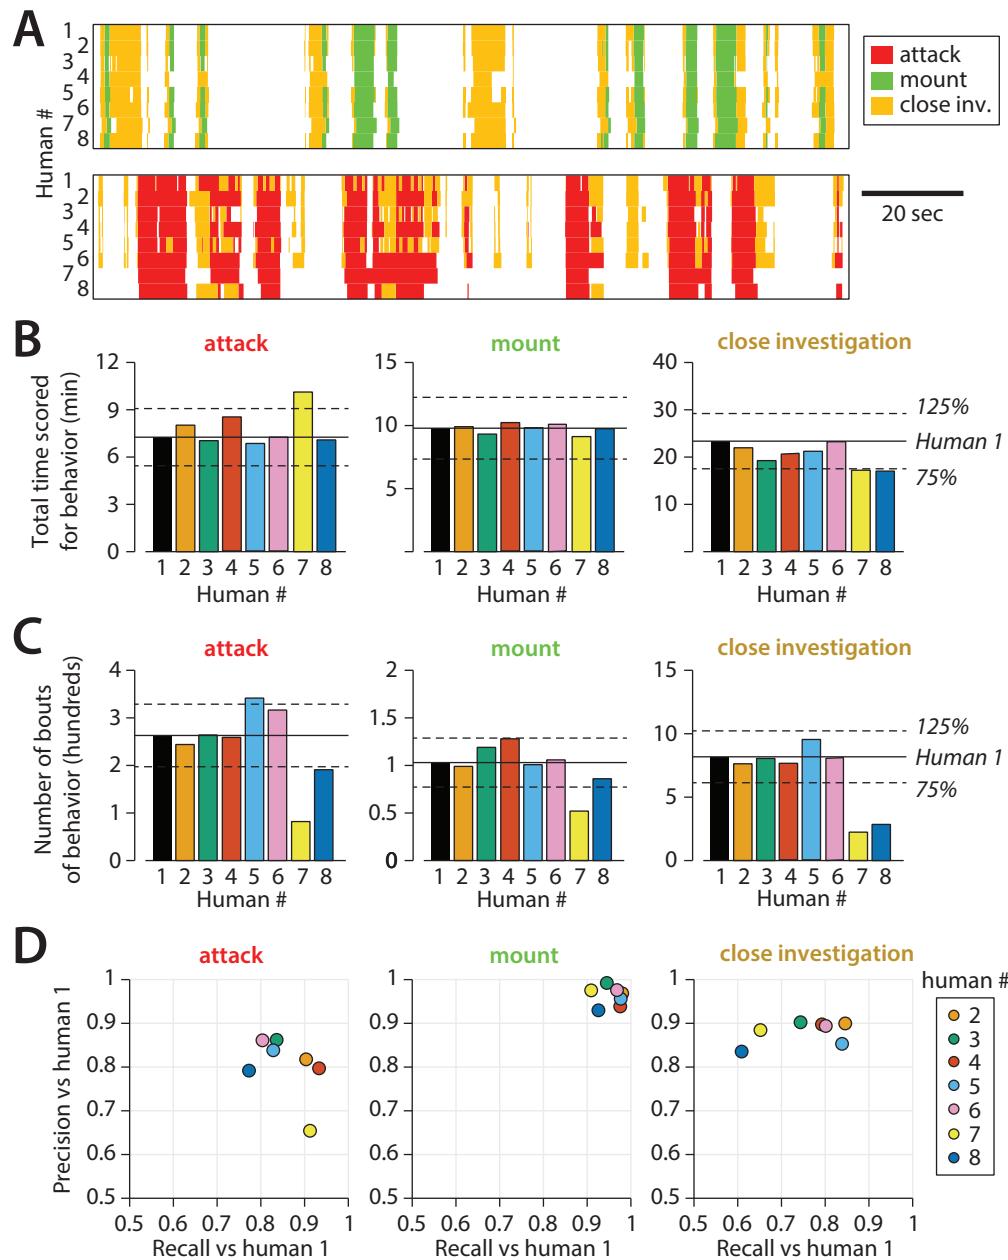

**ED Figure 5.** Expanded set of human annotations. All panels as in Figure 5, but with the two omitted annotators (human 7 and 8) included. **A**) Example annotation for attack, mounting, and close investigation behaviors by eight trained annotators on segments of male-female (top) and male-male (bottom) interactions. **B**) Inter-annotator variability in the total reported time mice spent engaging in each behavior. **C**) Inter-annotator variability in the number of reported bouts (contiguous sequences of frames) scored for each behavior. **a** Precision and recall of annotators (humans) 2-8 with respect to annotations by human 1 (source of MARS behavior classifier training annotations).

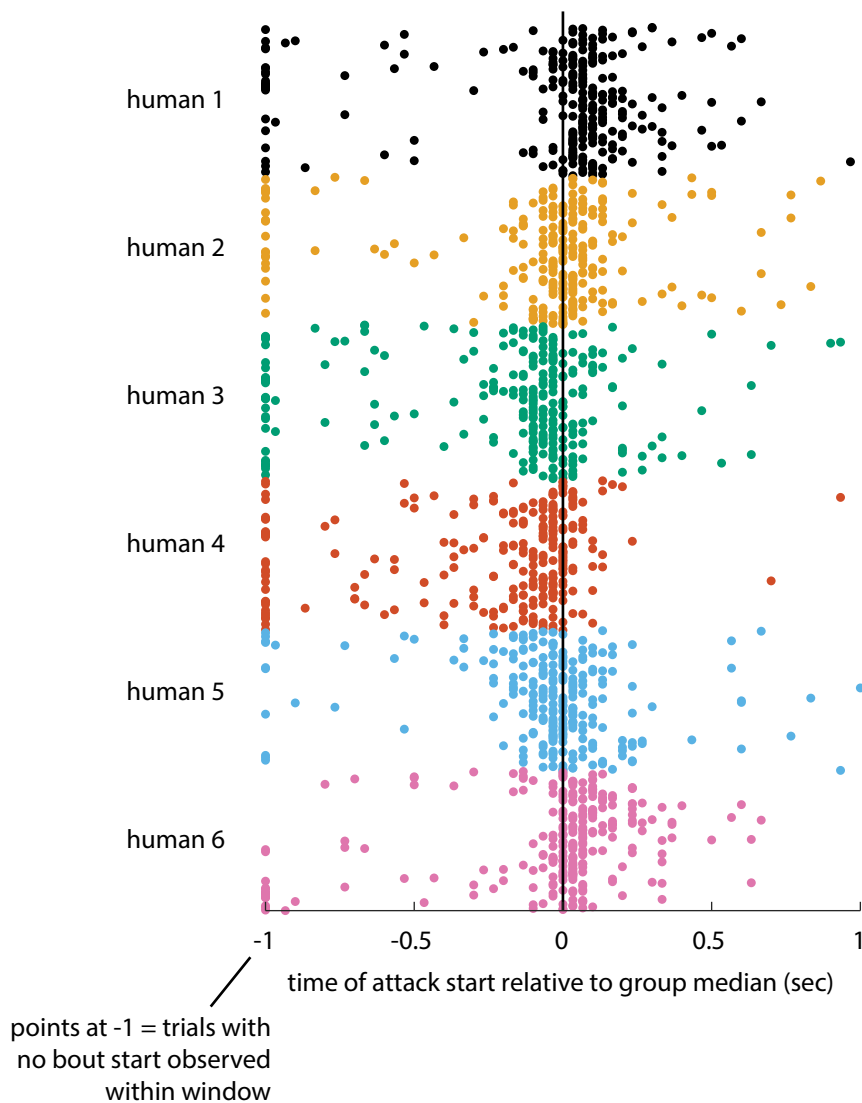

**ED Figure 6.** Within-annotator bias and variance in annotation of attack start time. Annotations of all attack bouts in the 10-video dataset by six human annotators. All attack bouts are aligned to the first frame on which at least three human annotators scored attack as occurring. Colored dots then reflect the time when each annotator scored each bout as starting, relative to this aligned time (the group median). Each annotator shows a characteristic bias (a shift in their mean annotation start time before or after the group median) and variance (the spread of annotation start times around this mean) in their annotation style. Some annotators did not score any attack initiated within a +/- 1 second window of the group median for a given bout: these points are plotted at time -1. Note that the average attack bout in the dataset is 1.65 seconds long (using annotations from human 1).

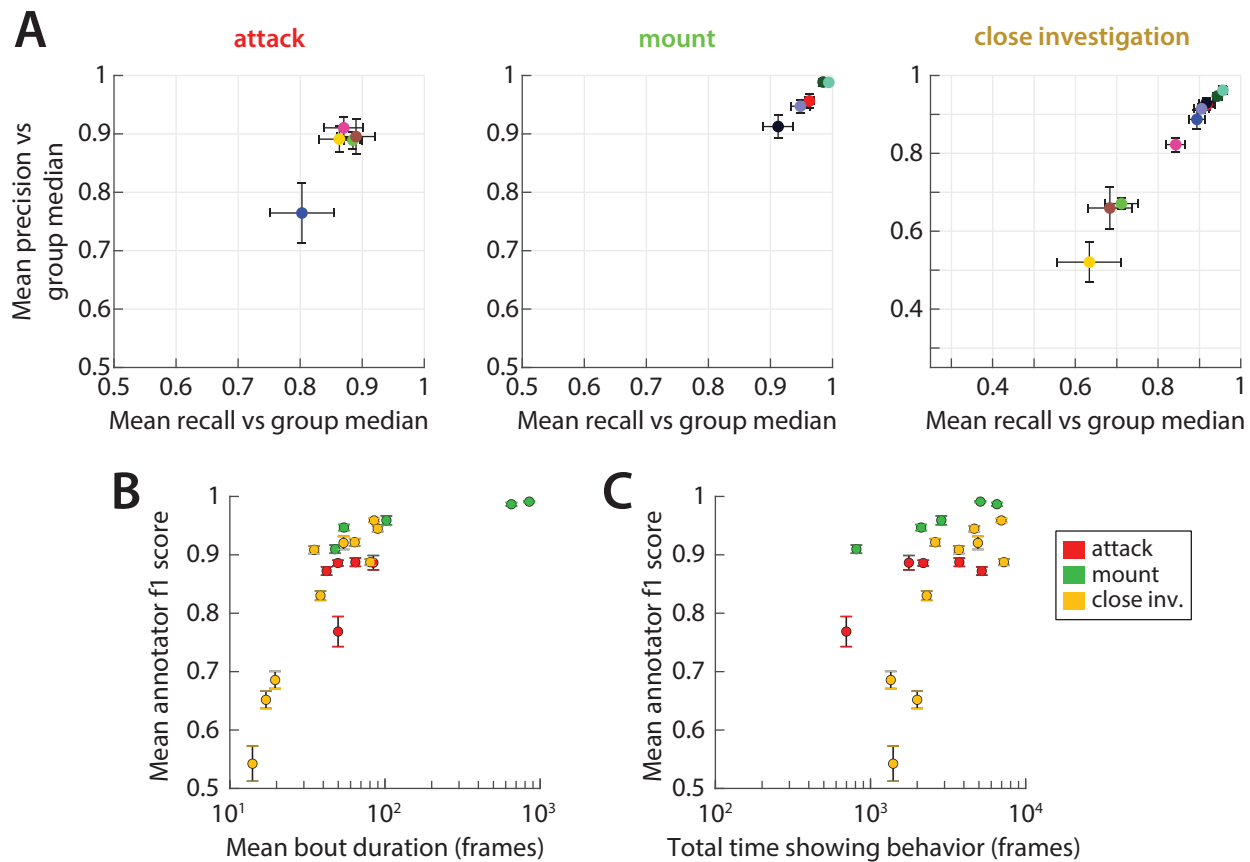

**ED Figure 7.** Inter-annotator accuracy on individual videos. **A)** Mean Precision and Recall of annotators 1-6, computed relative to the median of the other five annotators (mean  $\pm$  SEM.) Each plotted point is one video. **B)** Mean annotator F1 score (harmonic mean of Precision and Recall) plotted against the mean bout duration for each behavior in each video. Plot suggests a close positive correlation between the average duration of behavior bouts in a video (or dataset) and the accuracy of annotators as computed by Precision and Recall. **C)** Mean annotator F1 score plotted against the total number of frames annotated for a given behavior in each video. Correlation is weaker than in **B**.

### Six "best" annotators:

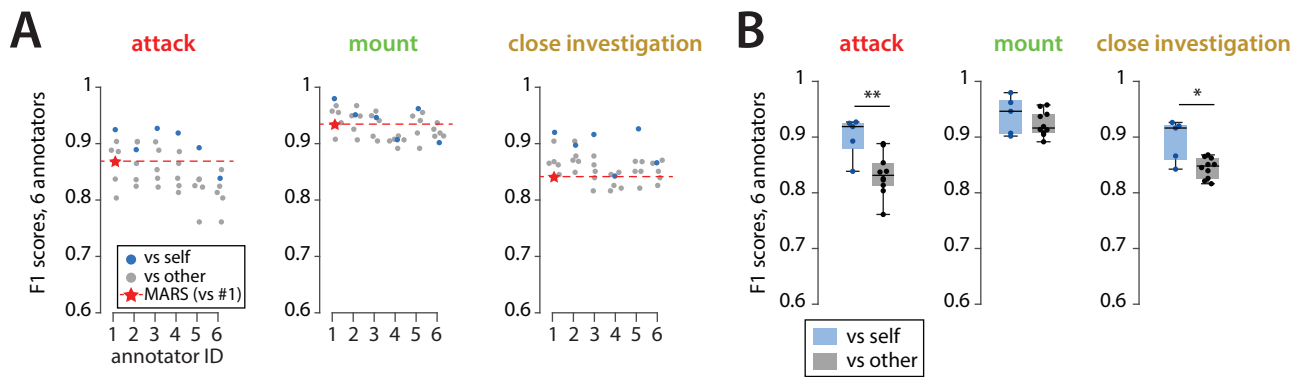

### All eight annotators:

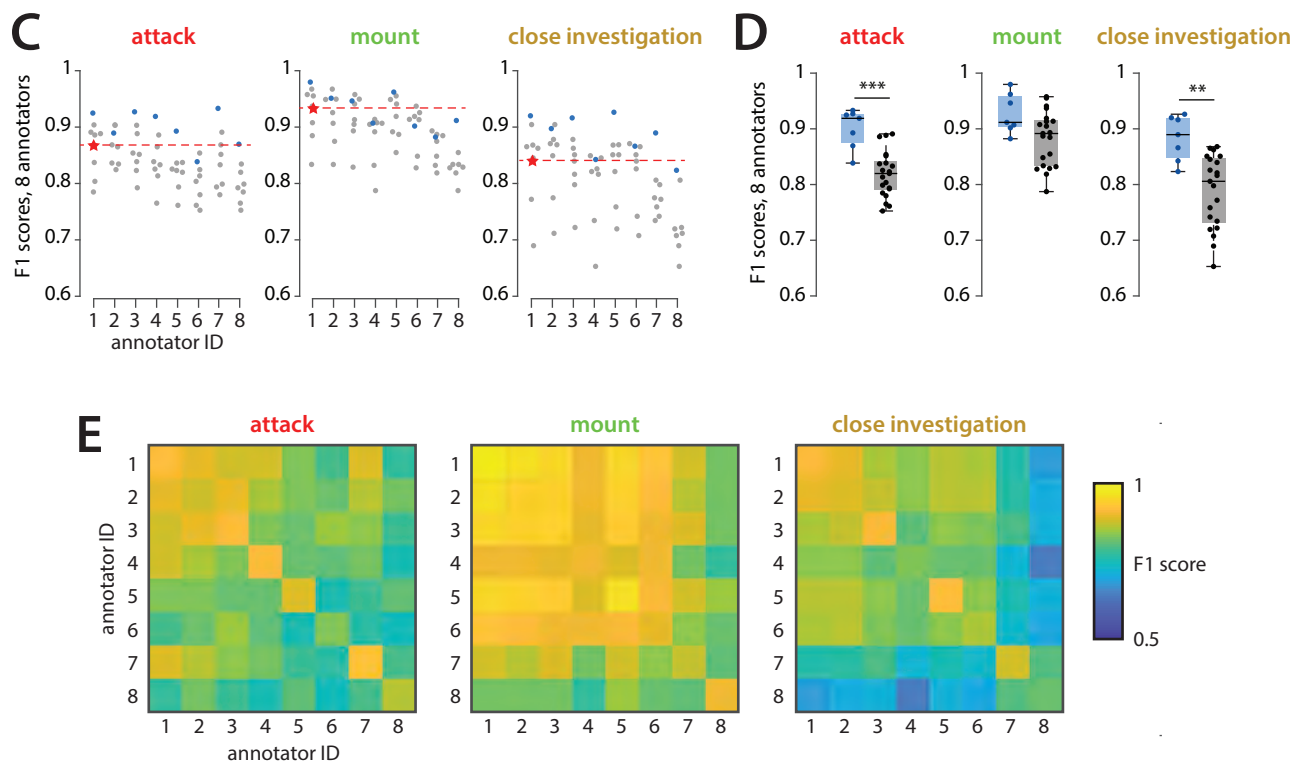

**ED Figure 8.** Inter- and intra-annotator variability. We asked 8 individuals to all annotate a pair of 10-minute videos twice, with at least 8 months between annotation sessions. **A)** F1 score within and between annotators: we treated a given annotator (X axis) as ground truth, and computed F1 score of each annotator with respect to these labels (for self comparison, we used the first annotation session as ground truth and the second as "prediction"). **B)** Summary of F1 score values in A, showing mean F1 score vs self and vs other across annotators. **C-D)** Same as in A, but including two additional annotators who were more variable. **E)** Same data as in C displayed as a matrix to capture annotator identity.

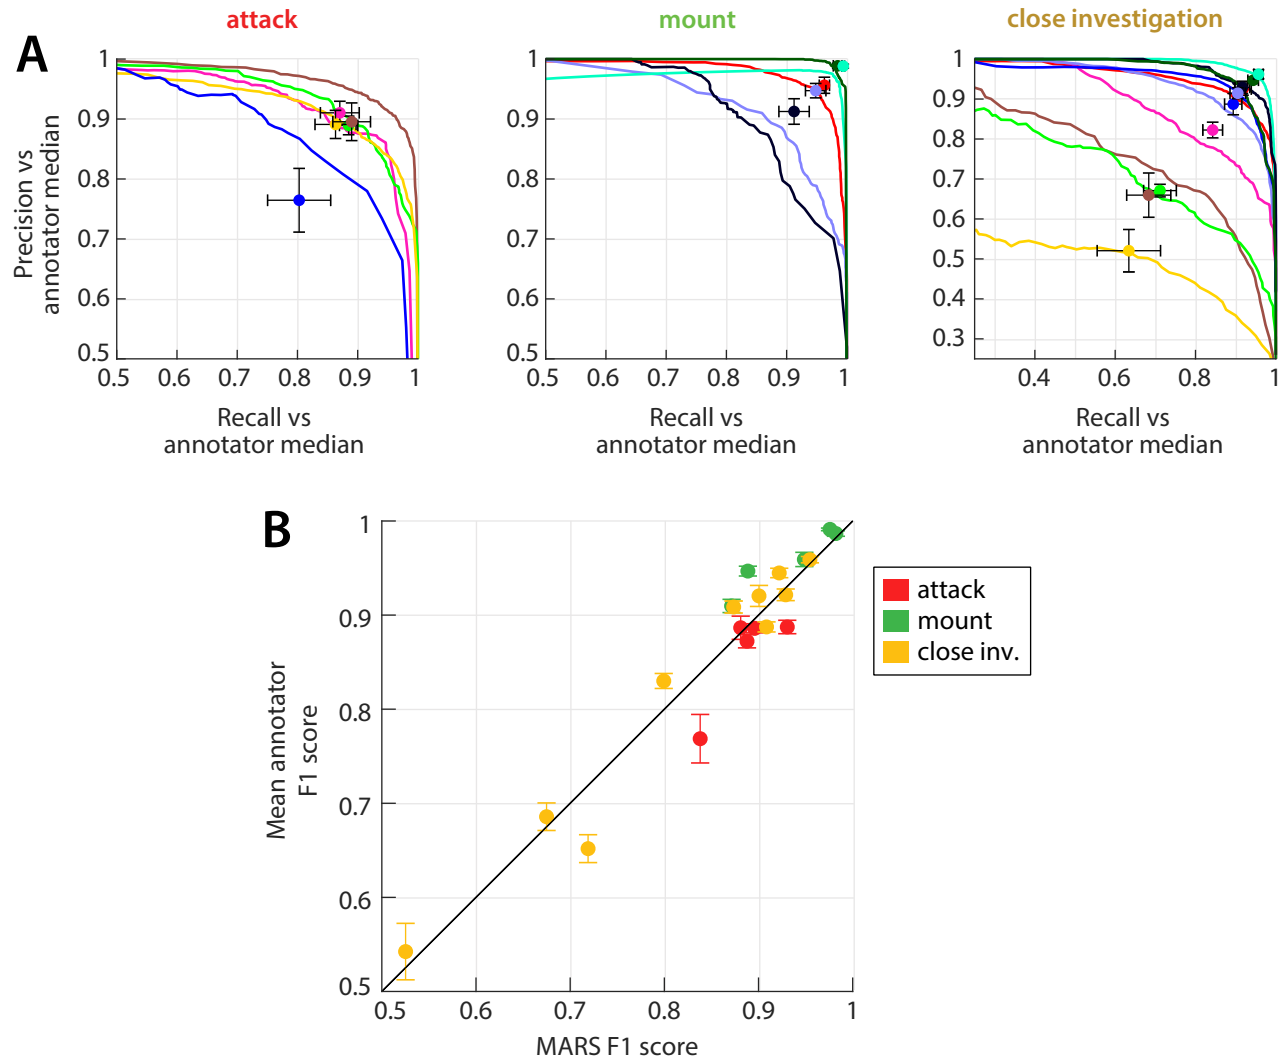

**ED Figure 9.** MARS Precision and Recall is closely correlated with that of annotators on individual videos. **A)** Mean Precision and Recall of annotators 1-6 for each behavior in each of 10 tested videos (plotted points; as in ED Figure 5), and MARS Precision-Recall (PR) curves for those videos. PR curves and points that are the same color correspond to the same video. **B)** Mean annotator F1 score plotted against MARS's F1 score for each behavior in each video. Performance of MARS is well predicted by the inter-human F1 score, which is in turn correlated with mean behavior bout duration (see ED Fig 5).

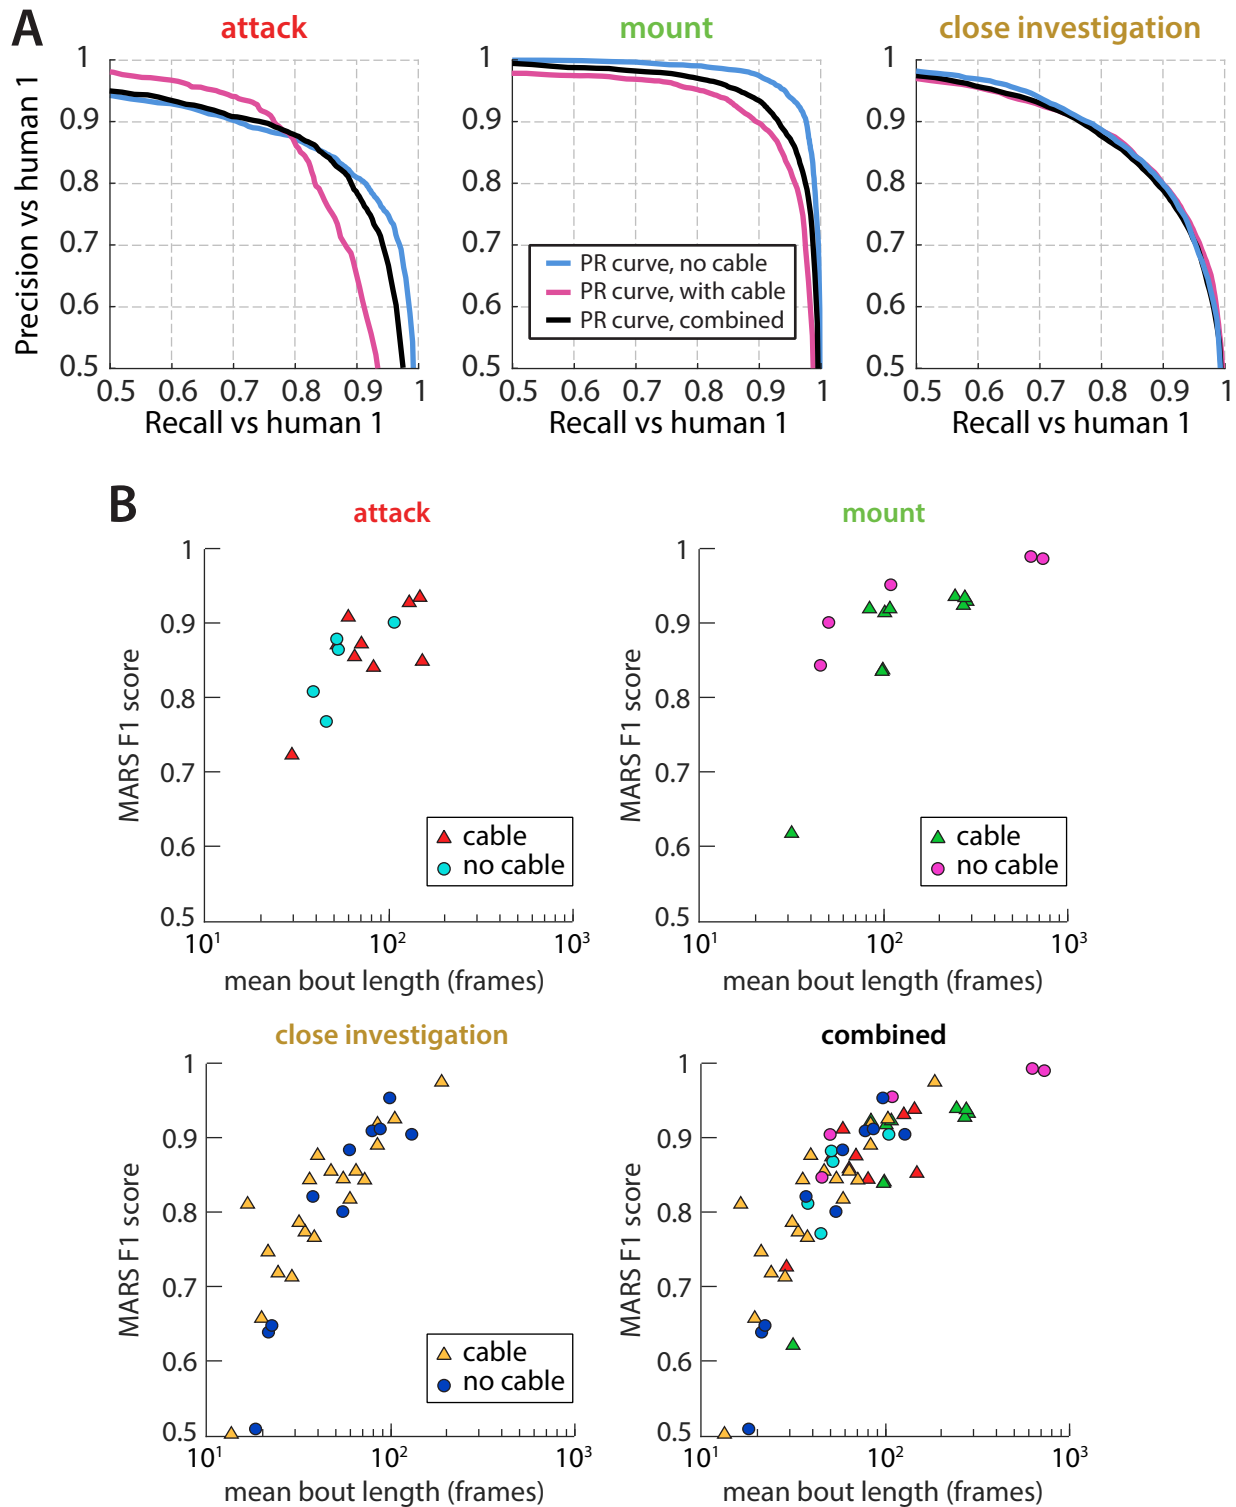

**ED Figure 10.** Evaluation of MARS on a larger test set. **A)** Precision-Recall (PR) curves of MARS classifiers for test set 1 (“no cable”), test set 2 (“with cable”) and for the two sets combined. **B)** F1 score of MARS classifiers for each behavior in each video, plotted against mean behavior bout duration in that video. Plots show no strong difference in performance between videos in which mice are unoperated (“no cable”) and videos in which mice are implanted with a head-attached device (“cable”).



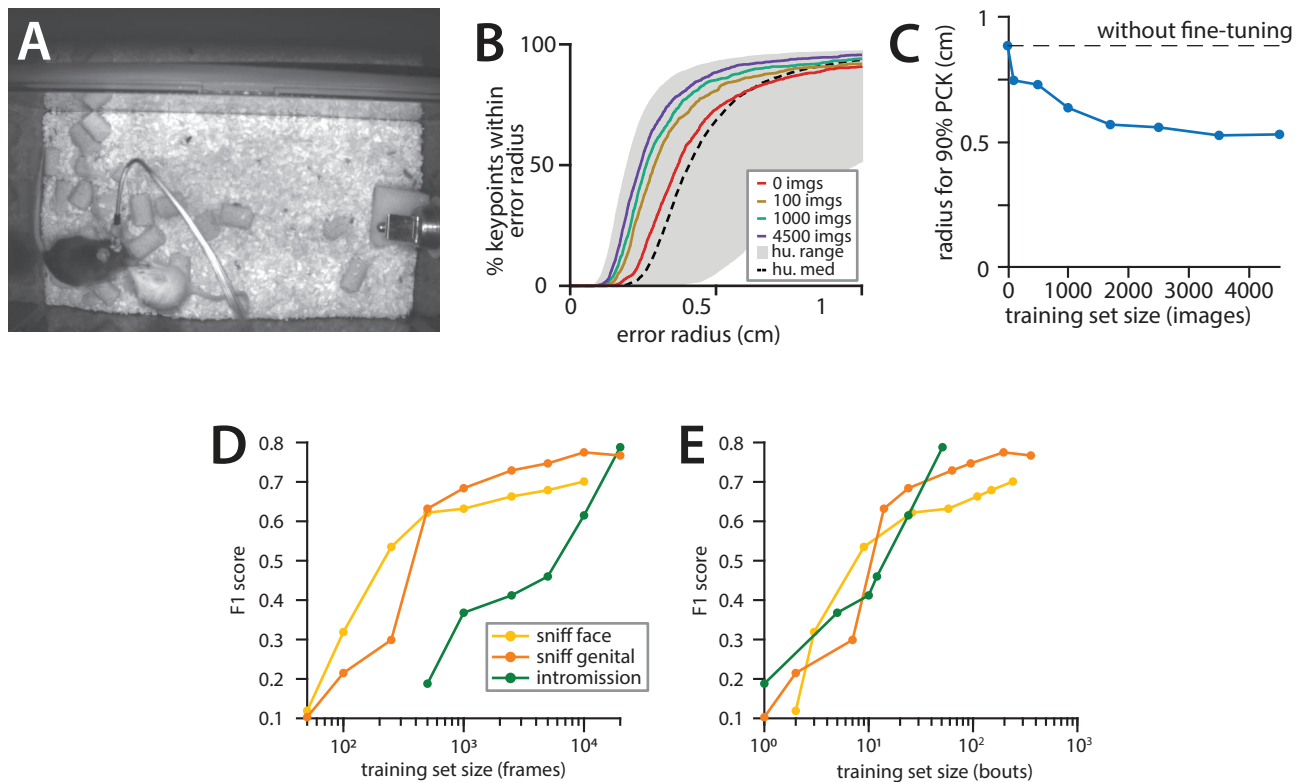

**ED Figure 11.** Training MARS on new datasets. **A)** Sample frame from CRIM13 dataset. **B)** Performance of MARS pose estimator fine-tuned to CRIM13 data, as a function of fine-tuning training set size. **C)** 90% PCK radius on CRIM13 data as a function of training set size. **D)** Performance of MARS classifiers for three additional social behaviors, as a function of training set size (number of frames annotated for the behavior of interest.) **E)** Same classifiers as in **D**, now showing performance as a function of the number of bouts annotated for the behavior of interest.
